# Supplementary material
Source: ML conference proceedings conference paper supplement (https://openreview.net/forum?id=OItvP2-i9j)
Supplement: supplementary_material [file attachment]

# Supplementary Material for “Closing the Gap: Tighter Analysis of Alternating Stochastic Gradient Methods for Bilevel Problems”

## Table of Contents

|          |                                                     |           |
|----------|-----------------------------------------------------|-----------|
| <b>A</b> | <b>Proof for stochastic bilevel problem</b>         | <b>15</b> |
| A.1      | Auxiliary Lemmas . . . . .                          | 15        |
| A.2      | Proof of Lemma 1 . . . . .                          | 16        |
| A.3      | Proof of Lemma 2 . . . . .                          | 17        |
| A.4      | Proof of Lemma 3 . . . . .                          | 18        |
| A.5      | Proof of Theorem 1 . . . . .                        | 19        |
| <br>     |                                                     |           |
| <b>B</b> | <b>Proof for stochastic min-max problem</b>         | <b>21</b> |
| B.1      | Verifying lemmas . . . . .                          | 21        |
| B.2      | Reduction from Theorem 1 to Proposition 3 . . . . . | 22        |
| <br>     |                                                     |           |
| <b>C</b> | <b>Proof for stochastic compositional problem</b>   | <b>22</b> |
| C.1      | Verifying lemmas . . . . .                          | 23        |
| C.2      | Reduction from Theorem 1 to Proposition 4 . . . . . | 24        |
| <br>     |                                                     |           |
| <b>D</b> | <b>Proof for actor-critic method</b>                | <b>24</b> |
| D.1      | Auxiliary lemmas . . . . .                          | 25        |
| D.2      | Convergence of critic variables . . . . .           | 27        |
| D.3      | Proof of Theorem 2 . . . . .                        | 28        |

## A Proof for stochastic bilevel problem

### A.1 Auxiliary Lemmas

Throughout the proof, we use  $\mathcal{F}_{k,t} = \sigma\{y^0, x^0, \dots, y^k, x^k, y^{k,1}, \dots, y^{k,t}\}$ ,  $\mathcal{F}'_k = \sigma\{y^0, x^0, \dots, y^{k+1}\}$ , where  $\sigma\{\cdot\}$  denotes the  $\sigma$ -algebra generated by the random variables.

We first present some results that will be used frequently in the proof.

**Proposition 5** (Restatement of Proposition 1). *Under Assumptions 1–3, we have the gradients*

$$\nabla F(x) = \nabla_x f(x, y^*(x)) - \nabla_{xy}^2 g(x, y^*(x)) [\nabla_{yy}^2 g(x, y^*(x))]^{-1} \nabla_y f(x, y^*(x)). \quad (32)$$

*Proof.* Define the Jacobian matrix

$$\nabla_x y(x) = \begin{bmatrix} \frac{\partial}{\partial x_1} y_1(x) & \cdots & \frac{\partial}{\partial x_d} y_1(x) \\ \vdots & \ddots & \vdots \\ \frac{\partial}{\partial x_1} y_{d'}(x) & \cdots & \frac{\partial}{\partial x_d} y_{d'}(x) \end{bmatrix}.$$

By the chain rule, it follows that

$$\nabla F(x) := \nabla_x f(x, y^*(x)) + \nabla_x y^*(x)^\top \nabla_y f(x, y^*(x)). \quad (33)$$

The minimizer  $y^*(x)$  satisfies

$$\nabla_y g(x, y^*(x)) = 0, \quad \text{thus} \quad \nabla_x (\nabla_y g(x, y^*(x))) = 0, \quad (34)$$

from which and the chain rule, it follows that

$$\nabla_{xy}^2 g(x, y^*(x)) + \nabla_x y^*(x)^\top \nabla_{yy}^2 g(x, y^*(x)) = 0.$$

By Assumption 2,  $\nabla_{yy}^2 g(x, y^*(x))$  is invertible, so from the last equation,

$$\nabla_x y^*(x)^\top := -\nabla_{xy}^2 g(x, y^*(x)) [\nabla_{yy}^2 g(x, y^*(x))]^{-1}. \quad (35)$$

Substituting (35) into (33) yields (6).

**Lemma 4** ([16, Lemma 2.2]). *Under Assumptions 1 and 2, we have*

$$\|\bar{\nabla}_x f(x, y^*(x)) - \bar{\nabla}_x f(x, y)\| \leq L_f \|y^*(x) - y\| \quad (36a)$$

$$\|\nabla F(x_1) - \nabla F(x_2)\| \leq L_F \|x_1 - x_2\| \quad (36b)$$

$$\|y^*(x_1) - y^*(x_2)\| \leq L_y \|x_1 - x_2\| \quad (36c)$$

with the constants  $L_f, L_y, L_F$  given by

$$L_f := \ell_{f,1} + \frac{\ell_{g,1}\ell_{f,1}}{\mu_g} + \frac{\ell_{f,0}}{\mu_g} \left( \ell_{g,2} + \frac{\ell_{g,1}\ell_{g,2}}{\mu_g} \right) = \mathcal{O}(\kappa^2), \quad L_y := \frac{\ell_{g,1}}{\mu_g} = \mathcal{O}(\kappa)$$

$$L_F := \ell_{f,1} + \frac{\ell_{g,1}(\ell_{f,1} + L_f)}{\mu_g} + \frac{\ell_{f,0}}{\mu_g} \left( \ell_{g,2} + \frac{\ell_{g,1}\ell_{g,2}}{\mu_g} \right) = \mathcal{O}(\kappa^3),$$

where the other constants are defined in Assumptions 1–3.

**Lemma 5** ([18, Lemma 11]). *Recall the definition of  $h_f^k$  in (10). Define*

$$\bar{h}_f^k := \mathbb{E}[h_f^k | \mathcal{F}'_k].$$

We have

$$\begin{aligned} \|\bar{\nabla}_x f(x^k, y^{k+1}) - \bar{h}_f^k\| &\leq \ell_{g,1}\ell_{f,1} \frac{1}{\mu_g} \left( 1 - \frac{\mu_g}{\ell_{g,1}} \right)^N =: b_k \\ \mathbb{E}[\|h_f^k - \bar{h}_f^k\|^2] &\leq \sigma_f^2 + \frac{3}{\mu_g^2} [(\sigma_f^2 + \ell_{f,0}^2)(\sigma_{g,2}^2 + 2\ell_{g,1}^2) + \sigma_f^2 \ell_{g,1}^2] =: \tilde{\sigma}_f^2 = \mathcal{O}(\kappa^2), \end{aligned}$$

where  $\kappa$  is the condition number defined below Assumption 2.

## A.2 Proof of Lemma 1

Using the Lipschitz property of  $\nabla F$  in Lemma 4, we have

$$\begin{aligned} \mathbb{E}[F(x^{k+1}) | \mathcal{F}'_k] &\leq F(x^k) + \mathbb{E}[\langle \nabla F(x^k), x^{k+1} - x^k \rangle | \mathcal{F}'_k] + \frac{L_F}{2} \mathbb{E}[\|x^{k+1} - x^k\|^2 | \mathcal{F}'_k] \\ &= F(x^k) - \alpha_k \langle \nabla F(x^k), \bar{h}_f^k \rangle + \frac{L_F \alpha_k^2}{2} \mathbb{E}[\|h_f^k\|^2 | \mathcal{F}'_k] \\ &\stackrel{(a)}{=} F(x^k) - \frac{\alpha_k}{2} \|\nabla F(x^k)\|^2 - \frac{\alpha_k}{2} \|\bar{h}_f^k\|^2 + \frac{\alpha_k}{2} \|\nabla F(x^k) - \bar{h}_f^k\|^2 \\ &\quad + \frac{L_F \alpha_k^2}{2} \|\bar{h}_f^k\|^2 + \frac{L_F \alpha_k^2}{2} \mathbb{E}[\|h_f^k - \bar{h}_f^k\|^2 | \mathcal{F}'_k] \\ &\stackrel{(b)}{\leq} F(x^k) - \frac{\alpha_k}{2} \|\nabla F(x^k)\|^2 - \left( \frac{\alpha_k}{2} - \frac{L_F \alpha_k^2}{2} \right) \|\bar{h}_f^k\|^2 \\ &\quad + \frac{\alpha_k}{2} \|\nabla F(x^k) - \bar{h}_f^k\|^2 + \frac{L_F \alpha_k^2}{2} \tilde{\sigma}_f^2 \end{aligned} \quad (37)$$

where (a) uses  $2a^\top b = \|a\|^2 + \|b\|^2 - \|a - b\|^2$  twice and (b) uses Lemma 5.

We decompose the gradient bias term as follows

$$\begin{aligned} \|\nabla F(x^k) - \bar{h}_f^k\|^2 &= \|\bar{\nabla} f(x^k, y^*(x^k)) - \bar{\nabla} f(x^k, y^{k+1}) + \bar{\nabla} f(x^k, y^{k+1}) - \bar{h}_f^k\|^2 \\ &\leq 2\|\bar{\nabla} f(x^k, y^*(x^k)) - \bar{\nabla} f(x^k, y^{k+1})\|^2 + 2\|\bar{\nabla} f(x^k, y^{k+1}) - \bar{h}_f^k\|^2 \\ &\stackrel{(a)}{\leq} 2L_f^2 \|y^{k+1} - y^*(x^k)\|^2 + 2b_k^2 \end{aligned} \quad (38)$$

where (a) follows from Lemma 4 and Lemma 5. Plugging (38) into (37) completes the proof.

### A.3 Proof of Lemma 2

Recalling the definition of  $\nabla_x y^*(x)$  in (35), for any  $x_1, x_2$ , we have

$$\begin{aligned}
& \|\nabla_x y^*(x_1) - \nabla_x y^*(x_2)\| \tag{39} \\
&= \|\nabla_{xy}^2 g(x_1, y^*(x_1)) [\nabla_{yy}^2 g(x_1, y^*(x_1))]^{-1} - \nabla_{xy}^2 g(x_2, y^*(x_2)) [\nabla_{yy}^2 g(x_2, y^*(x_2))]^{-1}\| \\
&\leq \|\nabla_{xy}^2 g(x_1, y^*(x_1)) - \nabla_{xy}^2 g(x_2, y^*(x_2))\| \|[\nabla_{yy}^2 g(x_1, y^*(x_1))]^{-1}\| \\
&\quad + \|\nabla_{xy}^2 g(x_2, y^*(x_2))\| \|[\nabla_{yy}^2 g(x_1, y^*(x_1))]^{-1} - [\nabla_{yy}^2 g(x_2, y^*(x_2))]^{-1}\| \\
&\stackrel{(a)}{\leq} \frac{1}{\mu_g} \|\nabla_{xy}^2 g(x_1, y^*(x_1)) - \nabla_{xy}^2 g(x_2, y^*(x_2))\| \\
&\quad + \ell_{g,1} \|[\nabla_{yy}^2 g(x_1, y^*(x_1))]^{-1} (\nabla_{yy}^2 g(x_1, y^*(x_1)) - \nabla_{yy}^2 g(x_2, y^*(x_2))) [\nabla_{yy}^2 g(x_2, y^*(x_2))]^{-1}\| \\
&\stackrel{(b)}{\leq} \frac{1}{\mu_g} \|\nabla_{xy}^2 g(x_1, y^*(x_1)) - \nabla_{xy}^2 g(x_2, y^*(x_2))\| + \frac{\ell_{g,1}}{\mu_g^2} \|\nabla_{xy}^2 g(x_1, y^*(x_1)) - \nabla_{xy}^2 g(x_2, y^*(x_2))\|
\end{aligned}$$

where both (a) and (b) follow from Assumption 1 and 2.

In addition, we have that

$$\begin{aligned}
& \frac{1}{\mu_g} \|\nabla_{xy}^2 g(x_1, y^*(x_1)) - \nabla_{xy}^2 g(x_2, y^*(x_2))\| + \frac{\ell_{g,1}}{\mu_g^2} \|\nabla_{xy}^2 g(x_1, y^*(x_1)) - \nabla_{xy}^2 g(x_2, y^*(x_2))\| \\
&\leq \frac{\ell_{g,2}}{\mu_g} \|x_1 - x_2\| + \frac{\ell_{g,2}}{\mu_g} \|y^*(x_1) - y^*(x_2)\| + \frac{\ell_{g,1}\ell_{g,2}}{\mu_g^2} \|x_1 - x_2\| + \frac{\ell_{g,1}\ell_{g,2}}{\mu_g^2} \|y^*(x_1) - y^*(x_2)\| \\
&\stackrel{(c)}{\leq} \left( \frac{\ell_{g,2} + \ell_{g,2}L_y}{\mu_g} + \frac{\ell_{g,1}(\ell_{g,2} + \ell_{g,2}L_y)}{\mu_g^2} \right) \|x_1 - x_2\| \tag{40}
\end{aligned}$$

where (c) follows from Lemma 4.

Next we derive the bound of  $h_f^k$ ,

$$\begin{aligned}
\mathbb{E}[\|h_f^k\|^2 | \mathcal{F}_k'] &= \|\bar{h}_f^k\|^2 + \mathbb{E}[\|h_f^k - \bar{h}_f^k\|^2 | \mathcal{F}_k'] \\
&\stackrel{(d)}{\leq} (\|\bar{\nabla} f(x^k, y^{k+1})\| + \|\bar{h}_f^k - \bar{\nabla} f(x^k, y^{k+1})\|)^2 + \tilde{\sigma}_f^2 \\
&\stackrel{(e)}{\leq} \left( \ell_{f,0} + \frac{\ell_{f,0}\ell_{g,1}}{\mu_g} + \frac{\ell_{g,1}\ell_{f,1}}{\mu_g} \left(1 - \frac{\mu_g}{\ell_{g,1}}\right)^N \right)^2 + \tilde{\sigma}_f^2 \\
&\leq \left( \ell_{f,0} + \frac{\ell_{f,0}\ell_{g,1}}{\mu_g} + \frac{\ell_{g,1}\ell_{f,1}}{\mu_g} \right)^2 + \tilde{\sigma}_f^2 \tag{41}
\end{aligned}$$

where (d) is from Lemma 5, and (e) is due to

$$\begin{aligned}
\|\bar{\nabla}_x f(x, y)\| &= \|\nabla_x f(x, y) - \nabla_{xy}^2 g(x, y) [\nabla_{yy}^2 g(x, y)]^{-1} \nabla_y f(x, y)\| \\
&\leq \|\nabla_x f(x, y)\| + \|\nabla_{xy}^2 g(x, y)\| \|[\nabla_{yy}^2 g(x, y)]^{-1}\| \|\nabla_y f(x, y)\| \\
&\leq \ell_{f,0} + \ell_{g,1} \frac{1}{\mu_g} \ell_{f,0}.
\end{aligned}$$

As a result, we have

$$L_{yx} := \frac{\ell_{g,2} + \ell_{g,2}L_y}{\mu_g} + \frac{\ell_{g,1}(\ell_{g,2} + \ell_{g,2}L_y)}{\mu_g^2} = \mathcal{O}(\kappa^3) \tag{42}$$

$$\tilde{C}_f^2 := \left( \ell_{f,0} + \frac{\ell_{g,1}}{\mu_g} \ell_{f,1} + \ell_{g,1} \ell_{f,1} \frac{1}{\mu_g} \right)^2 + \tilde{\sigma}_f^2 = \mathcal{O}(\kappa^2) \tag{43}$$

from which the proof is complete.

#### A.4 Proof of Lemma 3

This part of analysis is very important to obtain our improved results. We start by decomposing the error of the lower level variable as

$$\begin{aligned} \|y^{k+1} - y^*(x^{k+1})\|^2 &= \underbrace{\|y^{k+1} - y^*(x^k)\|^2}_{J_1} + \underbrace{\|y^*(x^{k+1}) - y^*(x^k)\|^2}_{J_2} \\ &\quad + 2 \underbrace{\langle y^{k+1} - y^*(x^k), y^*(x^k) - y^*(x^{k+1}) \rangle}_{J_3}. \end{aligned} \quad (44)$$

Notice that  $y^{k+1} = y^{k,T}$  as defined in (9a). We first analyze

$$\begin{aligned} &\mathbb{E}[\|y^{k,t+1} - y^*(x^k)\|^2 | \mathcal{F}_k^t] \\ &= \mathbb{E}[\|y^{k,t} - \beta_k h_g^{k,t} - y^*(x^k)\|^2 | \mathcal{F}_k^t] \\ &= \|y^{k,t} - y^*(x^k)\|^2 - 2\beta_k \langle y^{k,t} - y^*(x^k), \mathbb{E}[h_g^{k,t} | \mathcal{F}_k^t] \rangle + \beta_k^2 \mathbb{E}[\|h_g^{k,t}\|^2 | \mathcal{F}_k^t] \\ &\stackrel{(a)}{\leq} \|y^{k,t} - y^*(x^k)\|^2 - 2\beta_k \langle y^{k,t} - y^*(x^k), \nabla g(x^k, y^{k,t}) \rangle + \beta_k^2 \|\nabla g(x^k, y^{k,t})\|^2 + \beta_k^2 \sigma_{g,1}^2 \\ &\stackrel{(b)}{\leq} \left(1 - \frac{2\mu_g \ell_{g,1}}{\mu_g + \ell_{g,1}} \beta_k\right) \|y^{k,t} - y^*(x^k)\|^2 + \beta_k \left(\beta_k - \frac{2}{\mu_g + \ell_{g,1}}\right) \|\nabla_y g(x^k, y^{k,t})\|^2 + \beta_k^2 \sigma_{g,1}^2 \\ &\stackrel{(c)}{\leq} (1 - \rho_g \beta_k) \|y^{k,t} - y^*(x^k)\|^2 + \beta_k^2 \sigma_{g,1}^2 \end{aligned} \quad (45)$$

where (a) comes from the fact that  $\text{Var}[X] = \mathbb{E}[X^2] - \mathbb{E}[X]^2$ , (b) follows from the  $\mu_g$ -strong convexity and  $\ell_{g,1}$  smoothness of  $g(x, y)$  [53, Theorem 2.1.11], and (c) follows from the choice of stepsize  $\beta_k \leq \frac{2}{\mu_g + \ell_{g,1}}$  in (12) and the definition of  $\rho_g := \frac{2\mu_g \ell_{g,1}}{\mu_g + \ell_{g,1}}$ .

Taking expectation over  $\mathcal{F}_k^t$  on both sides of (45) and using induction, we are able to get

$$\mathbb{E}[J_1] = \mathbb{E}[\|y^{k+1} - y^*(x^k)\|^2] \leq (1 - \rho_g \beta_k)^T \mathbb{E}[\|y^k - y^*(x^k)\|^2] + T \beta_k^2 \sigma_{g,1}^2. \quad (46)$$

The upper bound of  $J_2$  can be derived as

$$\begin{aligned} \mathbb{E}[J_2] &= \mathbb{E}[\|y^*(x^{k+1}) - y^*(x^k)\|^2] \leq L_y^2 \mathbb{E}[\|x^{k+1} - x^k\|^2] \\ &= L_y^2 \alpha_k^2 \mathbb{E}[\mathbb{E}[\|h_f^k - \bar{h}_f^k + \bar{h}_f^k\|^2 | \mathcal{F}_k^t]] \\ &\leq L_y^2 \alpha_k^2 (\mathbb{E}[\|\bar{h}_f^k\|^2] + \tilde{\sigma}_f^2) \end{aligned} \quad (47)$$

where the inequality follows from Lemma 5.

Our analysis of the term  $J_3$  is very different from existing bilevel optimization literature [16, 18, 17, 25, 26]. The term  $J_3$  can be decomposed as

$$\begin{aligned} \mathbb{E}[J_3] &= -\underbrace{\mathbb{E}[\langle y^{k+1} - y^*(x^k), \nabla y^*(x^k)(x^{k+1} - x^k) \rangle]}_{J_3^1} \\ &\quad - \underbrace{\mathbb{E}[\langle y^{k+1} - y^*(x^k), y^*(x^{k+1}) - y^*(x^k) - \nabla y^*(x^k)(x^{k+1} - x^k) \rangle]}_{J_3^2}. \end{aligned} \quad (48)$$

Using the alternating update of  $x$  and  $y$ , e.g.,  $x^k \rightarrow y^{k+1} \rightarrow x^{k+1}$ , we can bound  $J_3^1$  by

$$\begin{aligned} -\mathbb{E}[\langle y^{k+1} - y^*(x^k), \nabla y^*(x^k)(x^{k+1} - x^k) \rangle] &= -\mathbb{E}[\langle y^{k+1} - y^*(x^k), \mathbb{E}[\nabla y^*(x^k)(x^{k+1} - x^k) | \mathcal{F}_k^t] \rangle] \\ &\stackrel{(d)}{=} -\alpha_k \mathbb{E}[\langle y^{k+1} - y^*(x^k), \nabla y^*(x^k) \bar{h}_f^k \rangle] \\ &\leq \alpha_k \mathbb{E}[\|y^{k+1} - y^*(x^k)\| \|\nabla y^*(x^k) \bar{h}_f^k\|] \\ &\stackrel{(e)}{\leq} \alpha_k L_y \mathbb{E}[\|y^{k+1} - y^*(x^k)\| \|\bar{h}_f^k\|] \\ &\stackrel{(f)}{\leq} 2\gamma_k \mathbb{E}[\|y^{k+1} - y^*(x^k)\|^2] + \frac{L_y^2 \alpha_k^2}{8\gamma_k} \mathbb{E}[\|\bar{h}_f^k\|^2] \end{aligned} \quad (49)$$

where (d) uses the fact that  $\bar{h}_f^k = \mathbb{E}[h_f^k | \mathcal{F}'_k]$ ; (e) follows from Lemma 4; and (f) uses the Young's inequality such that  $ab \leq 2\gamma_k a^2 + \frac{b^2}{8\gamma_k}$ .

Next we will use the smoothness of  $y^*(x)$  in Lemma 2. We can bound  $J_3^2$  by

$$\begin{aligned}
& - \mathbb{E}[\langle y^{k+1} - y^*(x^k), y^*(x^{k+1}) - y^*(x^k) - \nabla y^*(x^k)(x^{k+1} - x^k) \rangle] \\
& \leq \mathbb{E}[\|y^{k+1} - y^*(x^k)\| \|y^*(x^{k+1}) - y^*(x^k) - \nabla y^*(x^k)(x^{k+1} - x^k)\|] \\
& \stackrel{(g)}{\leq} \frac{L_{yx}}{2} \mathbb{E}[\|y^{k+1} - y^*(x^k)\| \|x^{k+1} - x^k\|^2] \\
& \stackrel{(h)}{\leq} \frac{\eta L_{yx}}{4} \mathbb{E}[\|y^{k+1} - y^*(x^k)\|^2 \mathbb{E}[\|x^{k+1} - x^k\|^2 | \mathcal{F}'_k]] + \frac{L_{yx}}{4\eta} \mathbb{E}[\mathbb{E}[\|x^{k+1} - x^k\|^2 | \mathcal{F}'_k]] \\
& \stackrel{(i)}{\leq} \frac{\eta L_{yx} \tilde{C}_f^2 \alpha_k^2}{4} \mathbb{E}[\|y^{k+1} - y^*(x^k)\|^2] + \frac{L_{yx} \alpha_k^2}{4\eta} (\mathbb{E}[\|\bar{h}_f^k\|^2] + \tilde{\sigma}_f^2)
\end{aligned} \tag{50}$$

where (g) uses the smoothness of  $y^*(x)$ ; (h) follows from the Young's inequality such that  $1 \leq \frac{\eta}{2} + \frac{1}{2\eta}$ ; and (i) uses the fact that  $\mathbb{E}[\|h_f^k\|^2 | \mathcal{F}'_k] \leq \tilde{C}_f^2$  in Lemma 2 and the variance bound in Lemma 5.

Plugging (49) and (50) into (48), we have

$$\mathbb{E}[J_3] \leq \left( 2\gamma_k + \frac{\eta L_{yx} \tilde{C}_f^2}{4} \alpha_k^2 \right) \mathbb{E}[\|y^{k+1} - y^*(x^k)\|^2] + \left( \frac{L_y^2 \alpha_k^2}{8\gamma_k} + \frac{L_{yx} \alpha_k^2}{4\eta} \right) \mathbb{E}[\|\bar{h}_f^k\|^2] + \frac{L_{yx} \alpha_k^2}{4\eta} \tilde{\sigma}_f^2. \tag{51}$$

Plugging (47), (51) into (44), we get

$$\begin{aligned}
\mathbb{E}[\|y^{k+1} - y^*(x^{k+1})\|^2] & \leq \left( 1 + 4\gamma_k + \frac{\eta L_{yx} \tilde{C}_f^2}{2} \alpha_k^2 \right) \mathbb{E}[\|y^{k+1} - y^*(x^k)\|^2] \\
& \quad + \left( L_y^2 \alpha_k^2 + \frac{L_y \alpha_k^2}{4\gamma_k} + \frac{L_{yx} \alpha_k^2}{2\eta} \right) \mathbb{E}[\|\bar{h}_f^k\|^2] + \left( L_y^2 \alpha_k^2 + \frac{L_{yx} \alpha_k^2}{2\eta} \right) \tilde{\sigma}_f^2
\end{aligned}$$

from which the proof is complete by choosing  $\gamma_k = L_f L_y \alpha_k$ .

## A.5 Proof of Theorem 1

Using Lemmas 1 and 3, we, respectively, bound the two difference terms in (15) and obtain

$$\begin{aligned}
& \mathbb{E}[\mathbb{V}^{k+1}] - \mathbb{E}[\mathbb{V}^k] \\
& \leq -\frac{\alpha_k}{2} \mathbb{E}[\|\nabla F(x^k)\|^2] - \left( \frac{\alpha_k}{2} - \frac{L_F \alpha_k^2}{2} - \frac{L_f}{L_y} L_y^2 \alpha_k^2 - \frac{L_f}{L_y} \frac{\alpha_k^2 L_y^2}{4\gamma_k} - \frac{L_f}{L_y} \frac{L_{yx} \alpha_k^2}{2\eta} \right) \mathbb{E}[\|\bar{h}_f^k\|^2] \\
& \quad + \frac{L_f}{L_y} \left( 1 + 4\gamma_k + L_f L_y \alpha_k + \frac{\eta L_{yx} \tilde{C}_f^2}{2} \alpha_k^2 \right) \mathbb{E}[\|y^{k+1} - y^*(x^k)\|^2] - \frac{L_f}{L_y} \mathbb{E}[\|y^k - y^*(x^k)\|^2] \\
& \quad + \alpha_k b_k^2 + \left( \frac{L_F}{2} + \frac{L_f}{L_y} L_y^2 + \frac{L_f}{L_y} \frac{L_{yx}}{2\eta} \right) \alpha_k^2 \tilde{\sigma}_f^2 \\
& \stackrel{(a)}{\leq} -\frac{\alpha_k}{2} \mathbb{E}[\|\nabla F(x^k)\|^2] - \left( \frac{\alpha_k}{2} - \frac{L_F \alpha_k^2}{2} - L_f L_y \alpha_k^2 - \frac{L_f}{L_y} \frac{\alpha_k^2 L_y^2}{4\gamma_k} - \frac{L_f}{L_y} \frac{L_{yx} \alpha_k^2}{2\eta} \right) \mathbb{E}[\|\bar{h}_f^k\|^2] \\
& \quad + \frac{L_f}{L_y} \left( \left( 1 + 4\gamma_k + L_f L_y \alpha_k + \frac{\eta L_{yx} \tilde{C}_f^2}{2} \alpha_k^2 \right) (1 - \rho_g \beta_k)^T - 1 \right) \mathbb{E}[\|y^k - y^*(x^k)\|^2] \\
& \quad + \frac{L_f}{L_y} \left( 1 + 4\gamma_k + L_f L_y \alpha_k + \frac{\eta L_{yx} \tilde{C}_f^2}{2} \alpha_k^2 \right) T \beta_k^2 \sigma_{g,1}^2 + \alpha_k b_k^2 + \left( \frac{L_F}{2} + L_f L_y + \frac{L_f}{L_y} \frac{L_{yx}}{2\eta} \right) \alpha_k^2 \tilde{\sigma}_f^2
\end{aligned} \tag{52}$$

where (a) uses (18a) in Lemma 3.

Selecting  $\gamma_k = L_f L_y \alpha_k$ , we can simplify (52) as

$$\begin{aligned}
\mathbb{E}[\mathbb{V}^{k+1}] - \mathbb{E}[\mathbb{V}^k] &\leq -\frac{\alpha_k}{2} \mathbb{E}[\|\nabla F(x^k)\|^2] - \left( \frac{\alpha_k}{2} - \frac{L_F \alpha_k^2}{2} - L_f L_y \alpha_k^2 - \frac{\alpha_k}{4} - \frac{L_f L_{yx} \alpha_k^2}{2\eta} \right) \mathbb{E}[\|\bar{h}_f^k\|^2] \\
&\quad + \frac{L_f}{L_y} \left( \left( 1 + 2L_f L_y \alpha_k + \frac{\eta L_{yx} \tilde{C}_f^2}{2} \alpha_k^2 \right) (1 - \rho_g \beta_k)^T - 1 \right) \mathbb{E}[\|y^k - y^*(x^k)\|^2] \\
&\quad + \frac{L_f}{L_y} \left( 1 + 5L_f L_y \alpha_k + \frac{\eta L_{yx} \tilde{C}_f^2}{4} \alpha_k^2 \right) T \beta_k^2 \sigma_{g,1}^2 \\
&\quad + \alpha_k b_k^2 + \left( \frac{L_F}{2} + L_f L_y + \frac{L_{yx} L_f}{2\eta L_y} \right) \alpha_k^2 \tilde{\sigma}_f^2. \tag{53}
\end{aligned}$$

To guarantee the descent of  $\mathbb{V}^k$ , the following constraints need to be satisfied

$$\alpha_k \leq \frac{1}{2L_F + 4L_f L_y + \frac{2L_f L_{yx}}{L_y \eta}} \tag{54a}$$

$$T \rho_g \beta_k \geq 2L_f L_y \alpha_k + \frac{\eta L_{yx} \tilde{C}_f^2}{2} \alpha_k^2 \tag{54b}$$

$$\beta_k \leq \frac{2}{\mu_g + \ell_{g,1}}. \tag{54c}$$

Finally, we define (with  $\rho_g := \frac{2\mu_g \ell_{g,1}}{\mu_g + \ell_{g,1}}$ )

$$\bar{\alpha}_1 = \frac{1}{2L_F + 4L_f L_y + \frac{2L_f L_{yx}}{L_y \eta}}, \quad \bar{\alpha}_2 = \frac{8T \rho_g}{(\mu_g + \ell_{g,1})(8L_f L_y + 2\eta L_{yx} \tilde{C}_f^2 \bar{\alpha}_1)} \tag{55}$$

and, to satisfy the condition (54), we select the following stepsizes as

$$\alpha_k = \min \left\{ \bar{\alpha}_1, \bar{\alpha}_2, \frac{\alpha}{\sqrt{K}} \right\}, \quad \beta_k = \frac{8L_f L_y + 2\eta L_{yx} \tilde{C}_f^2 \bar{\alpha}_1}{4T \rho_g} \alpha_k. \tag{56}$$

With the above choice of stepsizes, (53) can be simplified as

$$\mathbb{E}[\mathbb{V}^{k+1}] - \mathbb{E}[\mathbb{V}^k] \leq -\frac{\alpha_k}{2} \mathbb{E}[\|\nabla F(x^k)\|^2] + c_1 \alpha_k^2 \sigma_{g,1}^2 + \alpha_k b_k^2 + c_2 \alpha_k^2 \tilde{\sigma}_f^2 \tag{57}$$

where the constants  $c_1$  and  $c_2$  are defined as

$$\begin{aligned}
c_1 &= \frac{L_f}{L_y} \left( 1 + 5L_f L_y \bar{\alpha}_1 + \frac{\eta L_{yx} \tilde{C}_f^2}{4} \bar{\alpha}_1^2 \right) \left( \frac{8L_f L_y + 2\eta L_{yx} \tilde{C}_f^2 \bar{\alpha}_1}{4\rho_g} \right)^2 \frac{1}{T} \\
c_2 &= \left( \frac{L_F}{2} + L_f L_y + \frac{L_{yx} L_f}{2\eta L_y} \right). \tag{58}
\end{aligned}$$

Then telescoping leads to

$$\begin{aligned}
\frac{1}{K} \sum_{k=0}^{K-1} \mathbb{E}[\|\nabla F(x^k)\|^2] &\leq \frac{\mathbb{V}^0 + \sum_{k=0}^{K-1} \alpha_k b_k^2 + c_1 \alpha_k^2 \sigma_{g,1}^2 + c_2 T \beta_k^2 \tilde{\sigma}_f^2}{\frac{1}{2} \sum_{k=0}^{K-1} \alpha_k} \\
&\leq \frac{2\mathbb{V}^0}{K \min\{\bar{\alpha}_1, \bar{\alpha}_2\}} + \frac{2\mathbb{V}^0}{\alpha \sqrt{K}} + 2b_k^2 + \frac{2c_1 \alpha}{\sqrt{K}} \sigma_{g,1}^2 + \frac{2c_2 \alpha}{\sqrt{K}} \tilde{\sigma}_f^2. \tag{59}
\end{aligned}$$

To obtain the best  $\kappa$ -dependence, we choose the balancing constant  $\eta = \frac{L_f}{L_y} = \mathcal{O}(\kappa)$ , and then we can get  $\bar{\alpha}_1 = \mathcal{O}(\kappa^{-3})$ ,  $\bar{\alpha}_2 = \mathcal{O}(T\kappa^{-3})$ ,  $c_1 = \mathcal{O}(\kappa^9/T)$ ,  $c_2 = \mathcal{O}(\kappa^3)$ . To obtain  $b_k^2 = \frac{1}{\sqrt{K}}$ , we need  $N = \mathcal{O}(\kappa \log K)$ . Select  $\alpha = \Theta(\kappa^{-5/2})$  and  $T = \mathcal{O}(\kappa^4)$ , we are able to get

$$\frac{1}{K} \sum_{k=0}^{K-1} \mathbb{E}[\|\nabla F(x^k)\|^2] = \mathcal{O} \left( \frac{\kappa^3}{K} + \frac{\kappa^{5/2}}{\sqrt{K}} \right).$$

To achieve  $\epsilon$ -optimal solution, we need  $K = \mathcal{O}(\kappa^5 \epsilon^{-2})$ , and the number of evaluations of  $h_f^k, h_g^k$  are  $\mathcal{O}(\kappa^5 \epsilon^{-2}), \mathcal{O}(\kappa^9 \epsilon^{-2})$  respectively.

## B Proof for stochastic min-max problem

Recall that the lower-level function for the min-max problem is  $g(x, y; \phi) = -f(x, y; \xi)$ . Then we rewrite the bilevel problem (1) as

$$\min_{x \in \mathbb{R}^d} F(x) := \mathbb{E}_\xi [f(x, y^*(x); \xi)] \quad (60a)$$

$$\text{s.t. } y^*(x) = \arg \min_{y \in \mathbb{R}^{d'}} -\mathbb{E}_\xi [f(x, y; \xi)]. \quad (60b)$$

In this case, the bilevel gradient in (6) reduces to

$$\nabla F(x) := \nabla_x f(x, y^*(x)) + \nabla_x y^*(x)^\top \nabla_y f(x, y^*(x)) = \nabla_x f(x, y^*(x)) \quad (61)$$

where the second equality follows from the optimality condition of the lower-level problem, i.e.,  $\nabla_y f(x, y^*(x)) = 0$ . We approximate  $\nabla F(x)$  on a vector  $y$  in place of  $y^*(x)$ , denoted as  $\bar{\nabla} f(x, y) := \nabla_x f(x, y)$ . Therefore, the alternating stochastic gradients for this special case are given by

$$h_g^{k,t} = -\nabla_y f(x^k, y^{k,t}; \xi_1^k) \quad \text{and} \quad h_f^k = \nabla_x f(x^k, y^{k+1}; \xi_2^k). \quad (62)$$

### B.1 Verifying lemmas

We make the following assumptions that are counterparts of Assumptions 1–3, most of which are common in the min-max optimization literature [9, 10, 30, 28].

**Assumption 4** (Lipschitz continuity). *Assume that  $f(\cdot, y)$  is Lipschitz over  $x \in \mathbb{R}^d$ ; that is, we have  $\|f(x_1, y) - f(x_2, y)\| \leq \ell_{f,0} \|x_1 - x_2\|$ . Assume  $\nabla f, \nabla^2 f$  are  $\ell_{f,1}, \ell_{f,2}$ -Lipschitz continuous; that is, for  $z_1 := [x_1; y_1], z_2 := [x_2; y_2]$ , we have  $\|\nabla f(x_1, y_1) - \nabla f(x_2, y_2)\| \leq \ell_{f,1} \|z_1 - z_2\|, \|\nabla^2 f(x_1, y_1) - \nabla^2 f(x_2, y_2)\| \leq \ell_{f,2} \|z_1 - z_2\|$ .*

**Assumption 5** (Strong convexity of  $f$  in  $y$ ). *For any fixed  $x$ ,  $f(x, y)$  is  $\mu_f$ -strongly convex in  $y$ .*

Assumptions 1 and 2 together ensure that the first- and second-order derivations of  $f(x, y)$  as well as the solution mapping  $y^*(x)$  are well-behaved. Define the condition number  $\kappa := \ell_{f,1}/\mu_f$ .

**Assumption 6** (Stochastic derivatives). *The stochastic gradient  $\nabla f(x, y; \xi)$  is an unbiased estimator of  $\nabla f(x, y)$ ; and its variances is bounded by  $\sigma_f^2$ .*

Next we re-derive Lemmas 2, 4 and 5 for this special case.

**Lemma 6** (Counterparts of Lemmas 2, 4 and 5). *Under Assumptions 1–3, we have*

$$\text{(Lemma 2)} \quad \|\nabla y^*(x_1) - \nabla y^*(x_2)\| \leq L_{yx} \|x_1 - x_2\|, \quad \mathbb{E}[\|h_f^k\|^2 | \mathcal{F}'_k] \leq \tilde{C}_f^2$$

$$\text{(Lemma 4)} \quad \|\bar{\nabla} f(x, y^*(x)) - \bar{\nabla} f(x, y)\| \leq L_f \|y^*(x) - y\| \\ \|\nabla F(x_1) - \nabla F(x_2)\| \leq L_F \|x_1 - x_2\|, \quad \|y^*(x_1) - y^*(x_2)\| \leq L_y \|x_1 - x_2\|$$

$$\text{(Lemma 5)} \quad \bar{h}_f^k = \bar{\nabla} f(x^k, y^{k+1}), \quad \mathbb{E}[\|h_f^k - \bar{h}_f^k\|^2 | \mathcal{F}'_k] \leq \tilde{\sigma}_f^2$$

where the constants are defined as

$$L_{yx} = \frac{\ell_{f,2} + \ell_{f,2} L_y}{\mu_f} + \frac{\ell_{f,1}(\ell_{f,2} + \ell_{f,2} L_y)}{\mu_f^2} = \mathcal{O}(\kappa^3), \quad \tilde{C}_f^2 = \ell_{i,0}^2 + \sigma_f^2 \\ L_f = \ell_{f,1} = \mathcal{O}(1), \quad L_F = (\ell_{f,1} + \frac{\ell_{f,1}^2}{\mu_f}) = \mathcal{O}(\kappa), \quad L_y = \frac{\ell_{f,1}}{\mu_f} = \mathcal{O}(\kappa), \quad \tilde{\sigma}_f^2 = \sigma_f^2.$$

**Proof:** We first calculate  $L_f$  by

$$\|\bar{\nabla} f(x, y^*(x)) - \bar{\nabla} f(x, y)\| = \|\nabla_x f(x, y^*(x)) - \nabla_x f(x, y)\| \\ \leq \ell_{f,1} \|y^*(x) - y\| := L_f \|y^*(x) - y\|. \quad (63)$$

We then calculate  $L_F$  by

$$\|\nabla F(x_1) - \nabla F(x_2)\| = \|\nabla_x f(x_1, y^*(x_1)) - \nabla_x f(x_2, y^*(x_2))\| \\ \leq \|\nabla_x f(x_1, y^*(x_1)) - \nabla_x f(x_2, y^*(x_1))\| + \|\nabla_x f(x_2, y^*(x_1)) - \nabla_x f(x_2, y^*(x_2))\| \\ \leq \ell_{f,1} \|x_1 - x_2\| + \ell_{f,1} \|y^*(x_1) - y^*(x_2)\| \\ \leq \left( \ell_{f,1} + \frac{\ell_{f,1}^2}{\mu_f} \right) \|x_1 - x_2\| := L_F \|x_1 - x_2\|. \quad (64)$$

The calculation of  $L_y, L_{yx}$  follows the proof of Lemma 2 and Lemma 4, and  $\tilde{\sigma}_f^2, \tilde{C}_f^2, \sigma_g^2$  follows from the fact  $h_f^k = \nabla_x f(x^k, y^{k+1}; \xi_2^k), h_g^{k,t} = -\nabla_y f(x^k, y^{k,t}; \xi_2^{k,t})$ . Note that different from the bilevel case, the upper-level gradients  $h_f^k$  in the min-max case only contain  $\nabla_x f$  not  $\nabla_y f$ , which only needs the lipschitz continuity of  $x$ .

## B.2 Reduction from Theorem 1 to Proposition 3

In the min-max case, we apply Theorem 1 with  $\eta = 1$ . We define

$$\bar{\alpha}_1 = \frac{1}{2L_F + 4L_f L_y + \frac{L_f L_{yx}}{L_y}}, \quad \bar{\alpha}_2 = \frac{8T\rho_g}{(\mu_g + \ell_{g,1})(8L_f L_y + L_{yx}\tilde{C}_f^2\bar{\alpha}_1)}$$

and, to satisfy the condition (54), we select

$$\alpha_k = \min\{\bar{\alpha}_1, \bar{\alpha}_2, \frac{\alpha}{\sqrt{K}}\} \quad \text{and} \quad \beta_k = \frac{8L_f L_y + L_{yx}\tilde{C}_f^2\bar{\alpha}_1}{4T\rho_g}\alpha_k.$$

With the above choice of stepsizes, (59) can be simplified as

$$\frac{1}{K} \sum_{k=0}^{K-1} \mathbb{E}[\|\nabla F(x^k)\|^2] \leq \frac{2\mathbb{V}^0}{K \min\{\bar{\alpha}_1, \bar{\alpha}_2\}} + \frac{2\mathbb{V}^0}{\alpha\sqrt{K}} + \frac{2c_1\alpha}{\sqrt{K}}\sigma_f^2 + \frac{2c_2\alpha}{\sqrt{K}}\sigma_g^2, \quad (65)$$

where the constants can be defined as

$$c_1 = \frac{L_f}{L_y} \left( 1 + 2L_f L_y \alpha_k + \frac{L_{yx}\tilde{C}_f^2}{4}\alpha_k^2 \right) \left( \frac{8L_f L_y + \eta L_{yx}\tilde{C}_f^2\bar{\alpha}_1}{4\rho_g} \right)^2 \frac{1}{T} = \mathcal{O}\left(\frac{\kappa^3}{T}\right)$$

$$c_2 = \left( \frac{L_F}{2} + L_f L_y + \frac{L_{yx}L_f}{4L_y} \right) = \mathcal{O}(\kappa^2).$$

Note that  $\bar{\alpha}_1 = \mathcal{O}(\kappa^{-2}), \bar{\alpha}_2 = \mathcal{O}(T\kappa^{-2})$ . Select  $\alpha = \Theta(\kappa^{-1}), T = \Theta(\kappa)$ , then

$$\frac{1}{K} \sum_{k=0}^{K-1} \mathbb{E}[\|\nabla F(x^k)\|^2] = \mathcal{O}\left(\frac{\kappa^2}{K} + \frac{\kappa}{\sqrt{K}}\right). \quad (66)$$

To achieve  $\epsilon$ -accuracy, we need  $K = \mathcal{O}(\kappa^2\epsilon^{-2})$ . And the number of gradient evaluations for  $h_f^k, h_g^k$  are  $\mathcal{O}(\kappa^2\epsilon^{-2}), \mathcal{O}(\kappa^3\epsilon^{-2})$  respectively.

## C Proof for stochastic compositional problem

Recall that in the stochastic compositional problem, the upper-level function is defined as  $f(x, y; \xi) := f(y; \xi)$ , and the lower-level function is defined as  $g(x, y; \phi) := \frac{1}{2}\|y - h(x; \phi)\|^2$ . Then we rewrite the bilevel problem (1) as

$$\min_{x \in \mathbb{R}^d} F(x) := \mathbb{E}_\xi [f(y^*(x); \xi)] \quad (67a)$$

$$\text{s.t.} \quad y^*(x) = \arg \min_{y \in \mathbb{R}^{d'}} \frac{1}{2}\mathbb{E}_\phi [\|y - h(x; \phi)\|^2]. \quad (67b)$$

In this case, the bilevel gradient in (6) reduces to

$$\begin{aligned} \nabla F(x) &:= \nabla_{xy}^2 g(x, y^*(x)) [\nabla_{yy}^2 g(x, y^*(x))]^{-1} \nabla_y f(x, y^*(x)) \\ &= \nabla h(x; \phi)^\top \nabla_y f(y^*(x)) \end{aligned} \quad (68)$$

where we use the fact that  $\nabla_{yy}^2 g(x, y; \phi) = \mathbf{I}_{d' \times d'}$  and  $\nabla_{xy}^2 g(x, y; \phi) = -\nabla h(x; \phi)^\top$ .

Similar to Section 2, we again evaluate  $\nabla F(x)$  on a certain vector  $y$  in place of  $y^*(x)$ , which is denoted as  $\bar{\nabla} f(x, y) = \nabla h(x) \nabla f(y)$ . Therefore, the alternating stochastic gradients  $h_f^k, h_g^{k,t}$  for this special case are much simpler, given by

$$h_g^{k,t} = y^{k,t} - h(x^k; \phi^{k,t}) \quad \text{and} \quad h_f^k = \nabla h(x^k; \phi^k) \nabla f(y^{k+1}; \xi^k). \quad (69)$$

It can be observed that  $h_f^k$  is an unbiased estimate of  $\bar{\nabla} f(x^k, y^{k+1})$ , that is,  $\bar{h}_f^k = \bar{\nabla} f(x, y), b_k = 0$ .



## C.1 Verifying lemmas

We make the following assumptions that are counterparts of Assumptions 1–3, all of which are common in compositional optimization literature [12, 37, 14, 41, 38].

**Assumption 7** (Lipschitz continuity). *Assume that  $f, \nabla f, h, \nabla h$  are respectively  $\ell_{f,0}, \ell_{f,1}, \ell_{h,0}, \ell_{h,1}$ -Lipschitz continuous; that is, for  $z_1 := [x_1; y_1], z_2 := [x_2; y_2]$ , we have  $\|f(x_1, y_1) - f(x_2, y_2)\| \leq \ell_{f,0}\|z_1 - z_2\|, \|\nabla f(x_1, y_1) - \nabla f(x_2, y_2)\| \leq \ell_{f,1}\|z_1 - z_2\|, \|h(x_1) - h(x_2)\| \leq \ell_{h,0}\|x_1 - x_2\|, \|\nabla h(x_1) - \nabla h(x_2)\| \leq \ell_{h,1}\|x_1 - x_2\|$ .*

Note that the Lipschitz continuity of  $\nabla g, \nabla^2 g$  in Assumption 1 can be implied by the Lipschitz continuity of  $h, \nabla h$  in the above assumption. Assumption 2 is automatically satisfied for stochastic compositional problems since  $\nabla_{yy}g(x, y; \phi) = \mathbf{I}_{d' \times d'}$  and the condition number  $\kappa := 1$ .

**Assumption 8** (Stochastic derivatives). *The stochastic quantities  $\nabla f(x, y; \xi), h(x; \phi), \nabla h(x; \phi)$  are unbiased estimators of  $\nabla f(x, y), h(x), \nabla h(x)$ , respectively; and their variances are bounded by  $\sigma_f^2, \sigma_{h,0}^2, \sigma_{h,1}^2$ , respectively.*

The unbiasedness and bounded variance of  $\nabla g(x, y; \phi), \nabla^2 g(x, y; \phi)$  in Assumption 3 can be implied by the unbiasedness and bounded variance of  $h(x; \phi), \nabla h(x; \phi)$ .

Next we re-derive Lemmas 2, 4 and 5 for this special case.

**Lemma 7** (Counterparts of Lemmas 2, 4 and 5). *Under Assumptions 1–3, we have*

$$\begin{aligned} (\text{Lemma 2}) \quad & \|\nabla y^*(x_1) - \nabla y^*(x_2)\| \leq L_{yx}\|x_1 - x_2\|, \quad \mathbb{E}[\|h_f^k\|^2 | \mathcal{F}'_k] \leq \tilde{C}_f^2 \\ (\text{Lemma 4}) \quad & \|\bar{\nabla} f(x, y^*(x)) - \bar{\nabla} f(x, y)\| \leq L_f\|y^*(x) - y\| \\ & \|\nabla F(x_1) - \nabla F(x_2)\| \leq L_F\|x_1 - x_2\|, \quad \|y^*(x_1) - y^*(x_2)\| \leq L_y\|x_1 - x_2\| \\ (\text{Lemma 5}) \quad & \mathbb{E}[\|h_f^k - \bar{h}_f^k\|^2 | \mathcal{F}'_k] \leq \tilde{\sigma}_f^2, \quad \bar{h}_f^k = \bar{\nabla} f(x^k, y^{k+1}) \end{aligned}$$

where the constants are defined as

$$\begin{aligned} L_f &= \ell_{h,0}\ell_{f,1}, \quad L_y = \ell_{h,0}, \quad L_F = \ell_{h,0}^2\ell_{f,1} + \ell_{f,0}\ell_{h,1}, \quad L_{yx} = \ell_{h,1} \\ \tilde{\sigma}_f^2 &= \ell_{h,0}^2\sigma_f^2 + (\ell_{f,0}^2 + \sigma_f^2)\sigma_{h,1}^2, \quad \tilde{C}_f^2 = (\ell_{f,0}^2 + \sigma_f^2)(\ell_{h,0}^2 + \sigma_{h,1}^2). \end{aligned} \quad (70)$$

**Proof:** We first calculate  $L_f$  by

$$\begin{aligned} \|\bar{\nabla} f(x, y^*(x)) - \bar{\nabla} f(x, y)\| &= \|\nabla h(x)\nabla f(y^*(x)) - \nabla h(x)\nabla f(y)\| \\ &\leq \|\nabla h(x)\| \|\nabla f(y^*(x)) - \nabla f(y)\| \\ &\leq \ell_{h,0}\ell_{f,1}\|y^*(x) - y\| := L_f\|y^*(x) - y\|. \end{aligned}$$

We then calculate  $L_F$  by

$$\begin{aligned} \|\nabla F(x_1) - \nabla F(x_2)\| &= \|\nabla h(x_1)\nabla f(h(x_1)) - \nabla h(x_2)\nabla f(h(x_2))\| \\ &\leq \|\nabla h(x_1)\| \|\nabla f(h(x_1)) - \nabla f(h(x_2))\| + \|\nabla f(h(x_2))\| \|\nabla h(x_1) - \nabla h(x_2)\| \\ &\leq \ell_{h,0}^2\ell_{f,1}\|x_1 - x_2\| + \ell_{f,0}\ell_{h,1}\|x_1 - x_2\| \\ &:= L_F\|x_1 - x_2\|. \end{aligned} \quad (71)$$

We then calculate  $L_y$  and  $L_{yx}$  by

$$\begin{aligned} \|y^*(x_1) - y^*(x_2)\| &= \|h(x_1) - h(x_2)\| \leq \ell_{h,0}\|x_1 - x_2\| := L_y\|x_1 - x_2\| \\ \|\nabla y^*(x_1) - \nabla y^*(x_2)\| &= \|\nabla h(x_1) - \nabla h(x_2)\| \leq \ell_{h,1}\|x_1 - x_2\| := L_{yx}\|x_1 - x_2\|. \end{aligned}$$

We then calculate  $\tilde{\sigma}_f^2$  by

$$\begin{aligned} \mathbb{E}[\|h_f^k - \bar{h}_f^k\|^2 | \mathcal{F}'_k] &\leq \mathbb{E}[\|\nabla h(x^k; \phi_2^k)\nabla f(y^{k+1}; \xi^k) - \nabla h(x^k)\nabla f(y^{k+1})\|^2 | \mathcal{F}'_k] \\ &\leq \mathbb{E}[\|\nabla f(y^{k+1}; \xi^k)\|^2 \|\nabla h(x^k; \phi_2^k) - \nabla h(x^k)\|^2 | \mathcal{F}'_k] \\ &\quad + \mathbb{E}[\|\nabla h(x^k)\|^2 \|\nabla f(y^{k+1}; \xi^k) - \nabla f(y^{k+1})\|^2 | \mathcal{F}'_k] \\ &\leq (\ell_{f,0}^2 + \sigma_f^2)\sigma_{h,1}^2 + \ell_{h,0}^2\sigma_f^2 := \tilde{\sigma}_f^2. \end{aligned} \quad (72)$$

We then calculate  $\tilde{C}_f^2$  by

$$\begin{aligned}\mathbb{E}[\|h_f^k\|^2|\mathcal{F}'_k] &= \mathbb{E}[\|\nabla h(x^k; \phi_2^k)\nabla f(y^{k+1}; \xi^k)\|^2|\mathcal{F}'_k] \\ &\leq \mathbb{E}[\|\nabla f(y^{k+1}; \xi^k)\|^2|\mathcal{F}'_k]\mathbb{E}[\|\nabla h(x^k; \phi_2^k)\|^2|\mathcal{F}'_k] \\ &\leq (\ell_{f,0}^2 + \sigma_f^2)(\ell_{h,0}^2 + \sigma_{h,1}^2) := \tilde{C}_f^2.\end{aligned}\quad (73)$$

## C.2 Reduction from Theorem 1 to Proposition 4

In the compositional case, we apply Theorem 1 by setting  $T = 1, \alpha = 1, \eta = \frac{1}{\ell_{h,1}}$ . We define

$$\bar{\alpha}_1 = \frac{1}{6\ell_{h,0}^2\ell_{f,1} + 2\ell_{f,0}\ell_{h,1} + \ell_{f,1}\ell_{h,1}^2}, \quad \bar{\alpha}_2 = \frac{8}{(\mu_g + \ell_{g,1})(8\ell_{f,1}\ell_{h,0}^2 + \tilde{C}_f^2\bar{\alpha}_1)}$$

and, to satisfy the condition (54), we select

$$\alpha_k = \min\left\{\bar{\alpha}_1, \bar{\alpha}_2, \frac{\alpha}{\sqrt{K}}\right\} \quad \text{and} \quad \beta_k = \frac{8\ell_{f,1}\ell_{h,0}^2 + \tilde{C}_f^2\bar{\alpha}_1}{4}\alpha_k. \quad (74)$$

And the constants  $c_1, c_2$  in (58) reduce to

$$\begin{aligned}c_1 &= \ell_{f,1}\left(1 + 2\ell_{f,1}\ell_{h,0}^2\bar{\alpha}_1 + \frac{\tilde{C}_f^2}{4}\bar{\alpha}_1^2\right)\left(\frac{8\ell_{h,0}^2\ell_{f,1} + \tilde{C}_f^2\bar{\alpha}_1}{4}\right)^2 \\ c_2 &= \left(\frac{\ell_{h,0}^2\ell_{f,1} + \ell_{f,0}\ell_{h,1}}{2} + \ell_{h,0}^2\ell_{f,1} + \frac{\ell_{f,1}\ell_{h,1}^2}{4}\right).\end{aligned}\quad (75)$$

We apply (59) and get

$$\frac{1}{K}\sum_{k=0}^{K-1}\mathbb{E}[\|\nabla F(x^k)\|^2] \leq \frac{2\mathbb{V}^0}{K\min\{\bar{\alpha}_1, \bar{\alpha}_2\}} + \frac{2\mathbb{V}^0}{\alpha\sqrt{K}} + \frac{2c_1}{\sqrt{K}}\sigma_{h,1}^2 + \frac{2c_2}{\sqrt{K}}\tilde{\sigma}_f^2 = \mathcal{O}\left(\frac{1}{\sqrt{K}}\right) \quad (76)$$

from which the proof is complete.

## D Proof for actor-critic method

Recall the state feature mapping  $\phi(\cdot) : \mathcal{S} \rightarrow \mathbb{R}^{d'}$ . Define

$$A_{\theta,\phi} := \mathbb{E}_{s \sim \mu_\theta, s' \sim \mathcal{P}_{\pi_\theta}}[\phi(s)(\gamma\phi(s') - \phi(s))^\top], \quad (77a)$$

$$b_{\theta,\phi} := \mathbb{E}_{s \sim \mu_\theta, a \sim \pi_\theta, s' \sim \mathcal{P}}[r(s, a, s')\phi(s)]. \quad (77b)$$

It is known that for a given  $\theta$ , the stationary point  $y^*(\theta)$  of the TD update in (29) satisfies

$$A_{\theta,\phi}y^*(\theta) + b_{\theta,\phi} = 0. \quad (78)$$

Due to the special nature of the policy gradient, we make the following assumptions that will lead to the counterparts of Lemmas 2, 4 and 5 in reinforcement learning. These assumptions are mostly common in analyzing actor-critic method with linear value function approximation [50–52].

**Assumption 9.** For all  $s \in \mathcal{S}$ , the feature vector  $\phi(s)$  is normalized so that  $\|\phi(s)\|_2 \leq 1$ . For all eligible  $\theta$ ,  $A_{\theta,\phi}$  is negative definite and its maximum eigenvalue is upper bounded by constant  $-\lambda$ .

Assumption 9 is common in analyzing TD with linear function approximation; see e.g., [54, 55, 50]. With this assumption,  $A_{\theta,\phi}$  is invertible, so we have  $y^*(\theta) = -A_{\theta,\phi}^{-1}b_{\theta,\phi}$ . Defining  $R_y := r_{\max}/\lambda$ , we have  $\|y^*(\theta)\|_2 \leq R_y$ . It justifies the projection introduced in the critic update (29).

**Assumption 10.** For any  $\theta, \theta' \in \mathbb{R}^d$ ,  $s \in \mathcal{S}$  and  $a \in \mathcal{A}$ , there exist constants  $C_\psi, L_\psi, L_\pi$  such that: i)  $\|\psi_\theta(s, a)\|_2 \leq C_\psi$ ; ii)  $\|\psi_\theta(s, a) - \psi_{\theta'}(s, a)\|_2 \leq L_\psi\|\theta - \theta'\|_2$ ; iii)  $|\pi_\theta(a|s) - \pi_{\theta'}(a|s)| \leq L_\pi\|\theta - \theta'\|_2$ .

Assumption 10 is common in analyzing policy gradient-type algorithms which has also been made by e.g., [56, 57]. This assumption holds for many policy parameterization methods such as tabular softmax policy [57], Gaussian policy [58] and Boltzmann policy [44].

**Assumption 11.** For any  $\theta, \theta' \in \mathbb{R}^d$ , there exist constants such that: i)  $\|\nabla\mu_\theta(s)\|_2 \leq C_\mu$ ; ii)  $\|\nabla\mu_\theta(s) - \nabla\mu_{\theta'}(s)\|_2 \leq L_{\mu,1}\|\theta - \theta'\|_2$ ; iii)  $|\mu_\theta(s) - \mu_{\theta'}(s)| \leq L_{\mu,0}\|\theta - \theta'\|_2$ .

Assumption 11 is the counterpart of Assumption 10 that is made for the stationary distribution  $\mu_\theta(a|s)$ . Note that the existence of  $\nabla\mu_\theta(s)$  has been shown in [59]. In this case, under Assumption 10, i) and iii) of Assumption 11 can be obtained from the sensitivity analysis of Markov chain; see e.g., [60, Theorem 3.1]. While we cannot provide a justification of (ii), we found it necessary to ensure the smoothness of the lower-level critic solution  $y^*(\theta)$ .

**Assumption 12.** For any  $\theta$ , the Markov chain under  $\pi_\theta$  and transition kernel  $\mathcal{P}(\cdot|s, a)$  is irreducible and aperiodic. Then there exist constants  $\kappa > 0$  and  $\rho \in (0, 1)$  such that

$$\sup_{s \in \mathcal{S}} d_{TV}(\mathbb{P}(s_t \in \cdot | s_0 = s, \pi_\theta), \mu_\theta) \leq \kappa \rho^t, \quad \forall t \quad (79)$$

where  $\mu_\theta$  is the stationary state distribution under  $\pi_\theta$ , and  $s_t$  is the state of Markov chain at time  $t$ .

Assumption 12 assumes the Markov chain mixes at a geometric rate; see also [54, 55].

We define the critic approximation error as

$$\epsilon_{app} := \max_{\theta \in \mathbb{R}^d} \sqrt{\mathbb{E}_{s \sim \mu_\theta} |V_{\pi_\theta}(s) - \hat{V}_{y_\theta^*}(s)|^2}. \quad (80)$$

This error captures the quality of the critic function approximation; see also [61, 50, 51]. It becomes zero when the value function  $V_{\pi_\theta}$  belongs to the linear function space for any  $\theta$ .

## D.1 Auxiliary lemmas

We give a proposition regarding the  $L_F$ -Lipschitz of the policy gradient under proper assumptions.

**Proposition 6** (Smoothness of policy gradient [56]). *Suppose Assumption 10 holds. For any  $\theta, \theta' \in \mathbb{R}^d$ , we have  $\|\nabla F(\theta) - \nabla F(\theta')\|_2 \leq L_F\|\theta - \theta'\|_2$ , where  $L_F$  is a positive constant.*

We provide a justification for Lipschitz continuity of  $y^*(\theta)$  in the next proposition.

**Proposition 7** (Lipschitz continuity of  $y^*(\theta)$ ). *Suppose Assumption 10 and 12 hold. For any  $\theta_1, \theta_2 \in \mathbb{R}^d$ , we have  $\|y^*(\theta_1) - y^*(\theta_2)\|_2 \leq L_y\|\theta_1 - \theta_2\|_2$ , where  $L_y$  is a positive constant.*

*Proof.* We use  $y_1^*, y_2^*, A_1, A_2, b_1$  and  $b_2$  as shorthand notations of  $y^*(\theta_1), y^*(\theta_2), A_{\pi_{\theta_1}}, A_{\pi_{\theta_2}}, b_{\pi_{\theta_1}}$  and  $b_{\pi_{\theta_2}}$  respectively. By Assumption 9,  $A_{\theta, \phi}$  is invertible for any  $\theta \in \mathbb{R}^d$ , so we can write  $y^*(\theta) = -A_{\theta, \phi}^{-1}b_{\theta, \phi}$ . Then we have

$$\begin{aligned} \|y_1^* - y_2^*\|_2 &= \|-A_1^{-1}b_1 + A_2^{-1}b_2\|_2 \\ &= \|-A_1^{-1}b_1 - A_1^{-1}b_2 + A_1^{-1}b_2 + A_2^{-1}b_2\|_2 \\ &= \|-A_1^{-1}(b_1 - b_2) - (A_1^{-1} - A_2^{-1})b_2\|_2 \\ &\leq \|A_1^{-1}(b_1 - b_2)\|_2 + \|(A_1^{-1} - A_2^{-1})b_2\|_2 \\ &\leq \|A_1^{-1}\|_2\|b_1 - b_2\|_2 + \|A_1^{-1} - A_2^{-1}\|_2\|b_2\|_2 \\ &= \|A_1^{-1}\|_2\|b_1 - b_2\|_2 + \|A_1^{-1}(A_2 - A_1)A_2^{-1}\|_2\|b_2\|_2 \\ &\leq \|A_1^{-1}\|_2\|b_1 - b_2\|_2 + \|A_1^{-1}\|_2\|A_2^{-1}\|_2\|b_2\|_2\|A_2 - A_1\|_2 \\ &\leq \lambda^{-1}\|b_1 - b_2\|_2 + \lambda^{-2}r_{\max}\|A_1 - A_2\|_2, \end{aligned} \quad (81)$$

where the last inequality follows Assumption 9, and the fact that

$$\|b_2\|_2 = \|\mathbb{E}[r(s, a, s')\phi(s)]\|_2 \leq \mathbb{E}\|r(s, a, s')\phi(s)\|_2 \leq \mathbb{E}[\|r(s, a, s')\|\|\phi(s)\|_2] \leq r_{\max}. \quad (82)$$

Denote  $(s^1, a^1, s'^1)$  and  $(s^2, a^2, s'^2)$  as samples drawn with  $\theta_1$  and  $\theta_2$  respectively, i.e.  $s^1 \sim \mu_{\theta_1}$ ,  $a^1 \sim \pi_{\theta_1}$ ,  $s'^1 \sim \mathcal{P}$  and  $s^2 \sim \mu_{\theta_2}$ ,  $a^2 \sim \pi_{\theta_2}$ ,  $s'^2 \sim \mathcal{P}$ . Then we have

$$\begin{aligned} \|b_1 - b_2\|_2 &= \|\mathbb{E}[r(s^1, a^1, s'^1)\phi(s^1)] - \mathbb{E}[r(s^2, a^2, s'^2)\phi(s^2)]\|_2 \\ &\leq \sup_{s, a, s'} \|r(s, a, s')\phi(s)\|_2 \|\mathbb{P}((s^1, a^1, s'^1) \in \cdot) - \mathbb{P}((s^2, a^2, s'^2) \in \cdot)\|_{TV} \\ &\leq r_{\max} \|\mathbb{P}((s^1, a^1, s'^1) \in \cdot) - \mathbb{P}((s^2, a^2, s'^2) \in \cdot)\|_{TV} \\ &= 2r_{\max} d_{TV}(\mu_{\theta_1} \otimes \pi_{\theta_1} \otimes \mathcal{P}, \mu_{\theta_2} \otimes \pi_{\theta_2} \otimes \mathcal{P}) \\ &\leq 2r_{\max} |\mathcal{A}| L_\pi (1 + \log_\rho \kappa^{-1} + (1 - \rho)^{-1}) \|\theta_1 - \theta_2\|_2, \end{aligned} \quad (83)$$

where the first inequality follows the definition of total variation (TV) norm, and the last inequality follows in [50, Lemma A.1]. Similarly we have:

$$\begin{aligned}\|A_1 - A_2\|_2 &\leq 2(1 + \gamma)d_{TV}(\mu_{\theta_1} \otimes \pi_{\theta_1}, \mu_{\theta_2} \otimes \pi_{\theta_2}) \\ &= (1 + \gamma)|\mathcal{A}|L_\pi(1 + \log_\rho \kappa^{-1} + (1 - \rho)^{-1})\|\theta_1 - \theta_2\|_2 \\ &:= L_{A,0}\|\theta_1 - \theta_2\|_2.\end{aligned}\tag{84}$$

Substituting (83) and (84) into (81) completes the proof.  $\square$

We prove the Lipschitz continuity of  $\nabla_\theta y^*(\theta)$  next, for which we will use the following fact.

**Fact.** If the functions  $f(\theta), g(\theta)$  are bounded by  $C_f$  and  $C_g$ ; and are  $L_f$ - and  $L_g$ -Lipschitz continuous, then  $f(\theta)g(\theta)$  is also bounded by  $C_f C_g$  and is  $(C_f L_g + C_g L_f)$ -Lipschitz continuous.

*Proof.* Using the Cauchy-Schwartz inequality, it is easy to see that  $f(\theta), g(\theta)$  are bounded by  $C_f C_g$ . In addition, we have that

$$\begin{aligned}\|f(\theta_1)g(\theta_1) - f(\theta_2)g(\theta_2)\| &= \|f(\theta_1)g(\theta_1) - f(\theta_1)g(\theta_2) + f(\theta_1)g(\theta_2) - f(\theta_2)g(\theta_2)\| \\ &\leq \|f(\theta_1)\| \|g(\theta_1) - g(\theta_2)\| + \|f(\theta_1) - f(\theta_2)\| \|g(\theta_2)\| \\ &\leq (C_f L_g + C_g L_f)\|\theta_1 - \theta_2\|_2\end{aligned}$$

which implies that  $f(\theta), g(\theta)$  is  $(C_f L_g + C_g L_f)$ -Lipschitz continuous.

**Proposition 8** (Lipschitz continuity of  $\nabla_\theta y^*(\theta)$ ). *Suppose Assumption 10-12 hold. For any  $\theta_1, \theta_2 \in \mathbb{R}^d$ , we have  $\|\nabla_\theta y^*(\theta_1) - \nabla_\theta y^*(\theta_2)\|_2 \leq L_{yx}\|\theta_1 - \theta_2\|_2$ , where  $L_{yx}$  is a positive constant.*

*Proof.* With  $y^*(\theta) = -A_{\theta,\phi}^{-1}b_{\theta,\phi}$ , we have

$$\nabla_\theta y^*(\theta) = -\nabla_\theta(A_{\theta,\phi}^{-1}b_{\theta,\phi}) = -A_{\theta,\phi}^{-1}(\nabla_\theta A_{\theta,\phi})A_{\theta,\phi}^{-1}b_{\theta,\phi} - A_{\theta,\phi}(\nabla_\theta b_{\theta,\phi}).\tag{85}$$

To validate the Lipschitz continuity of  $\nabla_\theta y^*(\theta)$ , we need to show the boundedness and Lipschitz continuity of  $A_{\theta,\phi}^{-1}, b_{\theta,\phi}, \nabla_\theta A_{\theta,\phi}$  and  $\nabla_\theta b_{\theta,\phi}$ .

From (83) and (84), we have that there exist constants  $L_{A,0}$  and  $L_{b,0}$  such that  $A_{\theta,\phi}$  is  $L_{A,0}$ -Lipschitz continuous, and  $b_{\theta,\phi}$  is  $L_{b,0}$ -Lipschitz continuous. From Assumption 9 and (82), we have that there exist constants  $C_{A,0}$  and  $C_{b,0}$  such that  $\|A_{\theta,\phi}\|_2 \leq C_{A,0}$ , and  $\|b_{\theta,\phi}\|_2 \leq C_{b,0}$ .

In addition, using  $A_1$  and  $A_2$  as shorthand notations of  $A_{\pi_{\theta_1}}$  and  $A_{\pi_{\theta_2}}$ , respectively, we have

$$\begin{aligned}\|A_1^{-1} - A_2^{-1}\|_2 &= \|A_1^{-1}(A_2 - A_1)A_2^{-1}\|_2 \\ &\leq \|A_1^{-1}\|_2 \|A_2^{-1}\|_2 \|A_2 - A_1\|_2 \\ &\leq \lambda^{-2} \|A_1 - A_2\|_2 \\ &\stackrel{(84)}{\leq} \lambda^{-2} L_{A,0} \|\theta_1 - \theta_2\|_2.\end{aligned}\tag{86}$$

Therefore,  $A_{\theta,\phi}^{-1}$  is  $\lambda^{-2} L_{A,0}$ -Lipschitz continuous, and is bounded by  $\lambda^{-1}$  due to Assumption 9.

For simplicity, denote

$$A(s, s') := \phi(s)(\gamma\phi(s') - \phi(s))^\top, \quad b(s, a, s') := r(s, a, s')\phi(s)\tag{87}$$

and then  $b_{\theta,\phi} := \mathbb{E}_{s \sim \mu_\theta, a \sim \pi_\theta, s' \sim \mathcal{P}}[b(s, a, s')]$  and  $A_{\theta,\phi} := \mathbb{E}_{s \sim \mu_\theta, s' \sim \mathcal{P}_{\pi_\theta}}[A(s, s')]$ .

Next we analyze  $\nabla_\theta A_{\theta,\phi}$  and  $\nabla_\theta b_{\theta,\phi}$ , which is given by

$$\begin{aligned}\nabla_\theta A_{\theta,\phi} &= \nabla_\theta \left( \sum_{s, a, s'} \mu_\theta(s) \pi_\theta(a|s) P(s'|s, a) A(s, s') \right) \\ &= \sum_{s, a, s'} [\nabla_\theta \mu_\theta(s) \pi_\theta(a|s) P(s'|s, a) A(s, s') + \mu_\theta(s) \nabla_\theta \pi_\theta(a|s) P(s'|s, a) A(s, s')].\end{aligned}\tag{88}$$

From Assumption 10 and 11,  $\mu_\theta(s), \pi_\theta(a|s), \nabla_\theta \mu_\theta(s), \nabla_\theta \pi_\theta(a|s)$  are Lipschitz continuous and bounded. Using the **Fact**, we can show that there exist constants  $C_{A,1}$  and  $L_{A,1}$  such that  $\nabla_\theta A_{\theta,\phi}$  is  $L_{A,1}$ -Lipschitz continuous and bounded by  $C_{A,1}$ .

Likewise, we have

$$\begin{aligned}\nabla_{\theta} b_{\theta, \phi} &= \nabla_{\theta} \left( \sum_{s, a, s'} \mu_{\theta}(s) \pi_{\theta}(a|s) P(s'|s, a) b(s, a, s') \right) \\ &= \sum_{s, a, s'} [\nabla_{\theta} \mu_{\theta}(s) \pi_{\theta}(a|s) P(s'|s, a) b(s, a, s') + \mu_{\theta}(s) \nabla_{\theta} \pi_{\theta}(a|s) P(s'|s, a) b(s, a, s')].\end{aligned}\quad (89)$$

From Assumption 10 and 11,  $\mu_{\theta}(s)$ ,  $\pi_{\theta}(a|s)$ ,  $\nabla_{\theta} \mu_{\theta}(s)$ ,  $\nabla_{\theta} \pi_{\theta}(a|s)$  are Lipschitz continuous and bounded. Using the **Fact**, we are able to show that there exist constants  $C_{b,1}$  and  $L_{b,1}$  such that  $\nabla_{\theta} b_{\theta, \phi}$  is  $L_{b,1}$ -Lipschitz continuous and bounded by  $C_{b,1}$ .

Therefore, since  $A_{\theta, \phi}^{-1}$ ,  $b_{\theta, \phi}$ ,  $\nabla_{\theta} A_{\theta, \phi}$  and  $\nabla_{\theta} b_{\theta, \phi}$  are all Lipschitz continuous, using **Fact**, we can show that  $\nabla_{\theta} y^*(\theta)$  in (85) is  $L_{yx}$ -Lipschitz continuous, where  $L_{yx}$  depends on the constants  $C_{\mu}$ ,  $C_{\psi}$ ,  $L_{\pi}$ ,  $L_{\mu,0}$ ,  $L_{\mu,1}$ ,  $\lambda$  defined in Assumptions 10-12.  $\square$

## D.2 Convergence of critic variables

For brevity, we first define the following notations (cf.  $\xi := (s, a, s')$ ):

$$\begin{aligned}\hat{\delta}(\xi, y) &:= r(s, a, s') + \gamma \phi(s')^{\top} y - \phi(s)^{\top} y, \\ h_g(\xi, y) &:= \hat{\delta}(\xi, y) \phi(s), \\ \bar{h}_g(\theta, y) &:= \mathbb{E}_{s \sim \mu_{\theta}, a \sim \pi_{\theta}, s' \sim \mathcal{P}} [h_g(\xi, y)].\end{aligned}$$

We also define constant  $C_{\delta} := r_{\max} + (1 + \gamma) \max\{R_{\max}, R_y\}$ , and we immediately have

$$\|h_g(\xi, y)\|_2 \leq |r(\xi) + \gamma \phi(s')^{\top} y - \phi(s)^{\top} y| \leq r_{\max} + (1 + \gamma) R_y \leq C_g \quad (90)$$

and likewise, we have  $\|\bar{h}_g(\xi, y)\|_2 \leq C_g$ .

The critic update can be written compactly as:

$$y_{k+1} = \Pi_{R_y} (y_k + \beta_k g(\xi_k, y_k)), \quad (91)$$

where  $\xi_k := (s_k, a_k, s'_k)$  is the sample used to evaluate the stochastic gradient at  $k$ th update.

*Proof.* Using  $y^*(\theta_k)$  as shorthand notation of  $y_{\theta_k}^*$ , we start with the optimality gap

$$\begin{aligned}\|y_{k+1} - y^*(\theta_{k+1})\|_2^2 &= \|y_{k+1} - y^*(\theta_k) + y^*(\theta_k) - y^*(\theta_{k+1})\|_2^2 \\ &= \|y_{k+1} - y^*(\theta_k)\|_2^2 + \|y^*(\theta_k) - y^*(\theta_{k+1})\|_2^2 + 2 \langle y_{k+1} - y^*(\theta_k), y^*(\theta_k) - y^*(\theta_{k+1}) \rangle.\end{aligned}\quad (92)$$

We first bound

$$\begin{aligned}\|y_{k+1} - y^*(\theta_k)\|_2^2 &= \|\Pi_{R_y} (y_k + \beta_k g(\xi_k, y_k)) - y^*(\theta_k)\|_2^2 \\ &\leq \|y_k + \beta_k g(\xi_k, y_k) - y^*(\theta_k)\|_2^2 \\ &= \|y_k - y^*(\theta_k)\|_2^2 + 2\beta_k \langle y_k - y^*(\theta_k), g(\xi_k, y_k) \rangle + \|\beta_k g(\xi_k, y_k)\|_2^2.\end{aligned}\quad (93)$$

We first bound  $\mathbb{E}[\langle y_k - y^*(\theta_k), g(\theta_k, y_k) \rangle | y_k]$  in (92) as

$$\begin{aligned}\mathbb{E}[\langle y_k - y^*(\theta_k), g(\theta_k, y_k) \rangle | y_k] &= \langle y_k - y^*(\theta_k), \bar{h}_g(\theta_k, y_k) - \bar{h}_g(\theta_k, y^*(\theta_k)) \rangle \\ &= \left\langle y_k - y^*(\theta_k), \mathbb{E} \left[ (\gamma \phi(s') - \phi(s))^{\top} (y_k - y^*(\theta_k)) \phi(s) \right] \right\rangle \\ &= \left\langle y_k - y^*(\theta_k), \mathbb{E} \left[ \phi(s) (\gamma \phi(s') - \phi(s))^{\top} \right] (y_k - y^*(\theta_k)) \right\rangle \\ &= \left\langle y_k - y^*(\theta_k), A_{\pi_{\theta_k}} (y_k - y^*(\theta_k)) \right\rangle \\ &\leq -\lambda \|y_k - y^*(\theta_k)\|_2^2,\end{aligned}\quad (94)$$

where the first equality is due to  $\bar{h}_g(\theta, y_{\theta}^*) = A_{\theta, \phi} y_{\theta}^* + b = 0$ , and the last inequality follows Assumption 9.

Substituting (94) into (93), then taking expectation on both sides of (93) yields

$$\mathbb{E}\|y_{k+1} - y^*(\theta_k)\|_2^2 \leq (1 - 2\lambda\beta_k)\mathbb{E}\|y_k - y^*(\theta_k)\|_2^2 + C_g^2\beta_k^2 \quad (95)$$

and plugging into (92) yields

$$\begin{aligned} \mathbb{E}\|y_{k+1} - y^*(\theta_{k+1})\|_2^2 &\leq (1 - 2\lambda\beta_k)\mathbb{E}\|y_k - y^*(\theta_k)\|_2^2 \\ &\quad + 2\mathbb{E}\langle y_{k+1} - y^*(\theta_k), y^*(\theta_k) - y^*(\theta_{k+1}) \rangle + \mathbb{E}\|y^*(\theta_k) - y^*(\theta_{k+1})\|_2^2 + C_g^2\beta_k^2. \end{aligned} \quad (96)$$

Next we bound the third and fourth terms in (96) as

$$\begin{aligned} &\mathbb{E}\langle y_{k+1} - y^*(\theta_k), y^*(\theta_k) - y^*(\theta_{k+1}) \rangle \\ &= \mathbb{E}\langle y_{k+1} - y^*(\theta_k), y^*(\theta_k) - y^*(\theta_{k+1}) - (\nabla y^*(\theta_k))^\top (\theta_{k+1} - \theta_k) \rangle \\ &\quad + \mathbb{E}\langle y_{k+1} - y^*(\theta_k), (\nabla y^*(\theta_k))^\top (\theta_{k+1} - \theta_k) \rangle \\ &\stackrel{(a)}{\leq} \frac{L_{y,2}^2}{2}\mathbb{E}\|y_{k+1} - y^*(\theta_k)\|_2\|\theta_{k+1} - \theta_k\|_2^2 + \mathbb{E}[\langle y_{k+1} - y^*(\theta_k), \mathbb{E}[(\nabla y^*(\theta_k))^\top (\theta_{k+1} - \theta_k) \mid y_{k+1}] \rangle] \\ &\stackrel{(b)}{\leq} \frac{L_{y,2}^2}{2}\mathbb{E}\|y_{k+1} - y^*(\theta_k)\|_2\|\theta_{k+1} - \theta_k\|_2^2 + \alpha_k L_y \mathbb{E}\|y_{k+1} - y^*(\theta_k)\| \|\bar{h}_f(\theta_k, y_{k+1})\| \\ &\stackrel{(c)}{\leq} \frac{L_{y,2}^2}{4}\mathbb{E}\|y_{k+1} - y^*(\theta_k)\|_2^2\|\theta_{k+1} - \theta_k\|_2^2 + \frac{L_{y,2}^2}{4}\mathbb{E}\|\theta_{k+1} - \theta_k\|_2^2 + \alpha_k L_y \mathbb{E}\|y_{k+1} - y^*(\theta_k)\| \|\bar{h}_f(\theta_k, y_{k+1})\| \\ &\stackrel{(d)}{\leq} \frac{\alpha_k^2 C_f^2 L_{y,2}^2}{2}\mathbb{E}\|y_{k+1} - y^*(\theta_k)\|_2 + \frac{L_{y,2}^2}{4}\mathbb{E}\|\theta_{k+1} - \theta_k\|_2^2 + \alpha_k L_{y,2}^2 \mathbb{E}\|y_{k+1} - y^*(\theta_k)\|_2^2 + \frac{\alpha_k}{4}\mathbb{E}\|\bar{h}_f(\theta_k, y_{k+1})\|^2 \\ &\leq \left( \alpha_k L_{y,2}^2 + \frac{\alpha_k^2 C_f^2 L_{y,2}^2}{4} \right) \mathbb{E}\|y_{k+1} - y^*(\theta_k)\|_2^2 + \frac{\alpha_k}{4}\mathbb{E}\|\bar{h}_f(\theta_k, y_{k+1})\|^2 + \frac{\alpha_k^2 C_f^2 L_{y,2}^2}{4} \end{aligned} \quad (97)$$

where (a) follows from the  $L_{y,2}$ -smoothness of  $y^*$  with respect to  $\theta$ ; (b) follows from  $L_y$  is the Lipschitz constant of  $y^*$  in Proposition 7 and

$$\mathbb{E}[(\nabla y^*(\theta_k))^\top (\theta_{k+1} - \theta_k) \mid y_{k+1}] = \nabla y^*(\theta_k)^\top \bar{h}_f(\theta_k, y_{k+1});$$

(c) uses the Young's inequality; (d) uses the Young's inequality and the fact that  $\|\theta_{k+1} - \theta_k\|_2 = \alpha_k \|h_f(\xi_k', \theta_k, y_{k+1})\| \leq C_g C_\psi = C_f$  and  $\|\bar{h}_f(\theta_k, y_{k+1})\| \leq C_f$ .

We bound

$$\begin{aligned} \mathbb{E}\|y^*(\theta_k) - y^*(\theta_{k+1})\|_2^2 &\leq L_y^2 \mathbb{E}\|\theta_k - \theta_{k+1}\|_2^2 \\ &\leq L_y^2 \alpha_k^2 \mathbb{E}\left\| \hat{\delta}(\xi_k, y_k) \psi_{\theta_k}(s_k, a_k) \right\|_2^2 \leq L_y^2 C_f^2 \alpha_k^2 \end{aligned} \quad (98)$$

where the inequality is due to the  $L_y$ -Lipschitz of  $y^*(\theta)$  shown in Proposition 7, and the last inequality follows the fact that

$$\|\hat{\delta}(\xi_k, y_k) \psi_{\theta_k}(s_k, a_k)\|_2 \leq C_g C_\psi = C_f. \quad (99)$$

Substituting (97)-(98) into (92) yields

$$\begin{aligned} \mathbb{E}\|y_{k+1} - y^*(\theta_{k+1})\|_2^2 &\leq \left( 1 + \alpha_k L_{y,2}^2 + \frac{\alpha_k^2 C_f^2 L_{y,2}^2}{4} \right) \mathbb{E}\|y_{k+1} - y^*(\theta_k)\|_2^2 \\ &\quad + \frac{\alpha_k}{4}\mathbb{E}\|\bar{h}_f(\theta_k, y_{k+1})\|^2 + \frac{\alpha_k^2 C_f^2 L_{y,2}^2}{4} + L_y^2 C_f^2 \alpha_k^2. \end{aligned} \quad (100)$$

□

### D.3 Proof of Theorem 2

Recall the notations:

$$\begin{aligned} \hat{\delta}(\xi, y) &:= r(s, a, s') + \gamma \phi(s')^\top y - \phi(s)^\top y, \\ \bar{\delta}(\xi, y) &:= \mathbb{E}_{s \sim d_\theta, a \sim \pi_\theta, s' \sim \mathcal{P}} [r(s, a, s') + \gamma \phi(s')^\top y - \phi(s)^\top y \mid y] \\ \delta(\xi, \theta) &:= r(s, a, s') + \gamma V_{\pi_\theta}(s') - V_{\pi_\theta}(s). \end{aligned}$$

The actor update can be written compactly as:

$$\theta_{k+1} = \theta_k + \alpha_k h_f(\xi'_k, \theta_k, y_{k+1}) \quad (101)$$

where  $h_f(\xi'_k, \theta_k, y_{k+1}) := \hat{\delta}(\xi'_k, y_{k+1})\psi_{\theta_k}(s_k, a_k)$ . Define  $\bar{h}_f(\theta_k, y_{k+1}) := \mathbb{E}[\hat{\delta}(\xi'_k, y_{k+1})\psi_{\theta_k}(s_k, a_k)|y_{k+1}]$ . Then we are ready to give the convergence proof.

*Proof.* From  $L_F$ -Lipschitz of policy gradient in Proposition 6, taking expectation conditioned on  $\theta_k, y_{k+1}$ , we have:

$$\begin{aligned} & \mathbb{E}[F(\theta_{k+1})] - F(\theta_k) \quad (102) \\ & \geq \mathbb{E} \langle \nabla F(\theta_k), \theta_{k+1} - \theta_k \rangle - \frac{L_F}{2} \mathbb{E} \|\theta_{k+1} - \theta_k\|_2^2 \\ & \geq \alpha_k \mathbb{E} \langle \nabla F(\theta_k), \bar{h}_f(\theta_k, y_{k+1}) \rangle - \frac{L_F}{2} \mathbb{E} \|\theta_{k+1} - \theta_k\|_2^2 \\ & = \frac{\alpha_k}{2} \mathbb{E} \|\nabla F(\theta_k)\|^2 + \frac{\alpha_k}{2} \mathbb{E} \|\bar{h}_f(\theta_k, y_{k+1})\|^2 - \frac{\alpha_k}{2} \mathbb{E} \|\nabla F(\theta_k) - \bar{h}_f(\theta_k, y_{k+1})\|^2 - \frac{L_F}{2} \mathbb{E} \|\theta_{k+1} - \theta_k\|_2^2 \\ & \geq \frac{\alpha_k}{2} \mathbb{E} \|\nabla F(\theta_k)\|^2 + \frac{\alpha_k}{2} \mathbb{E} \|\bar{h}_f(\theta_k, y_{k+1})\|^2 - \frac{\alpha_k}{2} \mathbb{E} \|\nabla F(\theta_k) - \bar{h}_f(\theta_k, y_{k+1})\|^2 \\ & \quad - \frac{L_F \alpha_k^2}{2} \mathbb{E} \|\bar{h}_f(\theta_k, y_{k+1})\|_2^2 - \frac{L_F \alpha_k^2}{2} \mathbb{E} \|\bar{h}_f(\theta_k, y_{k+1}) - h_f(\xi'_k, \theta_k, y_{k+1})\|_2^2 \\ & \geq \frac{\alpha_k}{2} \mathbb{E} \|\nabla F(\theta_k)\|^2 + \left( \frac{\alpha_k}{2} - \frac{L_F \alpha_k^2}{2} \right) \mathbb{E} \|\bar{h}_f(\theta_k, y_{k+1})\|^2 - \frac{\alpha_k}{2} \mathbb{E} \|\nabla F(\theta_k) - \bar{h}_f(\theta_k, y_{k+1})\|^2 - \frac{L_F C_f^2 \alpha_k^2}{2} \end{aligned}$$

where the last inequality follows the definition of  $C_f$  in (99).

We next bound the gradient bias as

$$\begin{aligned} \|\nabla F(\theta_k) - \bar{h}_f(\theta_k, y_{k+1})\|^2 &= \left\| \nabla F(\theta_k) - \mathbb{E}[\hat{\delta}(\xi'_k, y_{k+1})\psi_{\theta_k}(s_k, a_k)|y_{k+1}] \right\|^2 \\ &\leq 2 \left\| \nabla F(\theta_k) - \mathbb{E}[\hat{\delta}(\xi'_k, y^*(\theta_k))\psi_{\theta_k}(s_k, a_k)|y_{k+1}] \right\|^2 \\ &\quad + 2 \left\| \mathbb{E}[(\hat{\delta}(\xi'_k, y^*(\theta_k)) - \hat{\delta}(\xi'_k, y_{k+1}))\psi_{\theta_k}(s_k, a_k)|y_{k+1}] \right\|^2 \\ &\leq 4 \underbrace{\left\| \nabla F(\theta_k) - \mathbb{E}[\delta(\xi'_k, \theta_k)\psi_{\theta_k}(s_k, a_k)|y_{k+1}] \right\|^2}_{I_1} \\ &\quad + 4 \underbrace{\left\| \mathbb{E}[\delta(\xi'_k, \theta_k)\psi_{\theta_k}(s_k, a_k)|y_{k+1}] - \mathbb{E}[\hat{\delta}(\xi'_k, y^*(\theta_k))\psi_{\theta_k}(s_k, a_k)|y_{k+1}] \right\|^2}_{I_2} \\ &\quad + 2 \underbrace{\left\| \mathbb{E}[(\hat{\delta}(\xi'_k, y^*(\theta_k)) - \hat{\delta}(\xi'_k, y_{k+1}))\psi_{\theta_k}(s_k, a_k)|y_{k+1}] \right\|^2}_{I_3}. \quad (103) \end{aligned}$$

Then we bound  $I_1$  as

$$\begin{aligned} I_1 &= \left\| \nabla F(\theta_k) - \mathbb{E}[\delta(\xi'_k, \theta_k)\psi_{\theta_k}(s_k, a_k)|\theta_k, y_{k+1}] \right\|^2 \\ &= \left\| \nabla F(\theta_k) - \mathbb{E}_{\substack{s_k \sim d_{\theta_k} \\ a_k \sim \pi_{\theta_k}, s'_k \sim \mathcal{P}}} \left[ \left( r(s_k, a_k, s'_k) + \gamma V_{\pi_{\theta_k}}(s'_k) - V_{\pi_{\theta_k}}(s_k) \right) \psi_{\theta_k}(s_k, a_k) \middle| \theta_k, y_{k+1} \right] \right\|^2 \\ &= \left\| \nabla F(\theta_k) - \mathbb{E}_{\substack{s_k \sim d_{\theta_k} \\ a_k \sim \pi_{\theta_k}}} \left[ A_{\pi_{\theta_k}}(s_k, a_k) \psi_{\theta_k}(s_k, a_k) \middle| \theta_k, y_{k+1} \right] \right\|^2 = 0 \end{aligned}$$

where the last equality follows from the policy gradient theorem.

Then we bound  $I_2$  as

$$\begin{aligned}
I_2 &= \left\| \mathbb{E}[\delta(\xi'_k, \theta_k) \psi_{\theta_k}(s_k, a_k) | \theta_k, y_{k+1}] - \mathbb{E}[\hat{\delta}(\xi'_k, y^*(\theta_k)) \psi_{\theta_k}(s_k, a_k) | \theta_k, y_{k+1}] \right\|^2 \\
&= \left\| \mathbb{E} \left[ \left( \delta(\xi'_k, \theta_k) - \hat{\delta}(\xi'_k, y^*(\theta_k)) \right) \psi_{\theta_k}(s_k, a_k) | \theta_k, y_{k+1} \right] \right\|^2 \\
&= \left\| \mathbb{E} \left[ \left| \delta(\xi'_k, \theta_k) - \hat{\delta}(\xi'_k, y^*(\theta_k)) \right| \|\psi_{\theta_k}(s_k, a_k)\| | \theta_k, y_{k+1} \right] \right\|^2 \\
&= C_\psi^2 \left\| \mathbb{E} \left[ \left| \delta(\xi'_k, \theta_k) - \hat{\delta}(\xi'_k, y^*(\theta_k)) \right| | \theta_k, y_{k+1} \right] \right\|^2 \\
&\leq C_\psi^2 \left( \gamma \mathbb{E} \left| \phi(s'_k)^\top y^*(\theta_k) - V_{\pi_{\theta_k}}(s'_k) \right| + \mathbb{E} \left| V_{\pi_{\theta_k}}(s_k) - \phi(s_k)^\top y^*(\theta_k) \right| \right) \\
&\leq C_\psi^2 \left( \gamma \sqrt{\mathbb{E} \left| \phi(s'_k)^\top y^*(\theta_k) - V_{\pi_{\theta_k}}(s'_k) \right|^2} + \sqrt{\mathbb{E} \left| V_{\pi_{\theta_k}}(s_k) - \phi(s_k)^\top y^*(\theta_k) \right|^2} \right) \\
&\leq C_\psi^2 (1 + \gamma) \epsilon_{app}.
\end{aligned}$$

Then we bound  $I_3$  as

$$\begin{aligned}
I_3 &= \left\| \mathbb{E}[\hat{\delta}(\xi'_k, y^*(\theta_k)) - \hat{\delta}(\xi'_k, y_{k+1})] \psi_{\theta_k}(s_k, a_k) | \theta_k, y_{k+1} \right\|^2 \\
&\leq C_\psi^2 \mathbb{E} \left[ \|\hat{\delta}(\xi'_k, y^*(\theta_k)) - \hat{\delta}(\xi'_k, y_{k+1})\|^2 | \theta_k, y_{k+1} \right] \\
&= C_\psi^2 \mathbb{E} \left[ \|\gamma \phi(s'_k)^\top y^*(\theta_k) - \phi(s_k)^\top y^*(\theta_k) - \gamma \phi(s'_k)^\top y_{k+1} + \phi(s_k)^\top y_{k+1}\|^2 | \theta_k, y_{k+1} \right] \\
&\leq C_\psi^2 (1 + \gamma) \|y^*(\theta_k) - y_{k+1}\|^2.
\end{aligned}$$

Then (103) can be rewritten as

$$\|\nabla F(\theta_k) - \bar{h}_f(\theta_k, y_{k+1})\|^2 \leq 4C_\psi^2(1 + \gamma)\epsilon_{app} + 2C_\psi^2(1 + \gamma)\|y^*(\theta_k) - y_{k+1}\|^2$$

plugging which into (102) leads to

$$\begin{aligned}
\mathbb{E}[F(\theta_{k+1})] &\geq F(\theta_k) + \frac{\alpha_k}{2} \mathbb{E} \|\nabla F(\theta_k)\|^2 + \left( \frac{\alpha_k}{2} - \frac{L_F \alpha_k^2}{2} \right) \mathbb{E} \|\bar{h}_f(\theta_k, y_{k+1})\|^2 \\
&\quad - \frac{\alpha_k}{2} \mathbb{E} \|\nabla F(\theta_k) - \bar{h}_f(\theta_k, y_{k+1})\|^2 - \frac{L_F C_f^2 \alpha_k^2}{2} \\
&\geq F(\theta_k) + \frac{\alpha_k}{2} \mathbb{E} \|\nabla F(\theta_k)\|^2 + \left( \frac{\alpha_k}{2} - \frac{L_F \alpha_k^2}{2} \right) \mathbb{E} \|\bar{h}_f(\theta_k, y_{k+1})\|^2 - \frac{L_F C_f^2 \alpha_k^2}{2} \\
&\quad - 2\alpha_k C_\psi^2(1 + \gamma)\epsilon_{app} - \alpha_k C_\psi^2(1 + \gamma)\|y^*(\theta_k) - y_{k+1}\|^2. \tag{104}
\end{aligned}$$

Consider the difference of the Lyapunov function  $\mathbb{V}^k := -F(\theta_k) + \|y_k - y^*(\theta_k)\|_2^2$ , given by

$$\begin{aligned}
\mathbb{E}[\mathbb{V}^{k+1}] - \mathbb{E}[\mathbb{V}^k] &= -\mathbb{E}[F(\theta_{k+1})] + \mathbb{E}\|y_{k+1} - y^*(\theta_{k+1})\|_2^2 + \mathbb{E}[F(\theta_k)] - \mathbb{E}\|y_k - y^*(\theta_k)\|_2^2 \\
&\leq -\frac{\alpha_k}{2} \mathbb{E} \|\nabla F(\theta_k)\|^2 - \left( \frac{\alpha_k}{2} - \frac{L_F \alpha_k^2}{2} \right) \mathbb{E} \|\bar{h}_f(\theta_k, y_{k+1})\|^2 + \frac{L_F C_f^2 \alpha_k^2}{2} + 2\alpha_k C_\psi^2(1 + \gamma)\epsilon_{app} \\
&\quad + \alpha_k C_\psi^2(1 + \gamma)\|y^*(\theta_k) - y_{k+1}\|^2 + \mathbb{E}\|y_{k+1} - y^*(\theta_{k+1})\|_2^2 - \mathbb{E}\|y_k - y^*(\theta_k)\|_2^2 \\
&\leq -\frac{\alpha_k}{2} \mathbb{E} \|\nabla F(\theta_k)\|^2 - \left( \frac{\alpha_k}{2} - \frac{\alpha_k}{4} - \frac{L_F \alpha_k^2}{2} \right) \mathbb{E} \|\bar{h}_f(\theta_k, y_{k+1})\|^2 + \frac{L_F C_f^2 \alpha_k^2}{2} \\
&\quad + \left( 1 + \alpha_k L_{y,2}^2 + \frac{\alpha_k^2 C_f^2 L_{y,2}^2}{4} + \alpha_k C_\psi^2(1 + \gamma) \right) \mathbb{E} \left[ \|y_{k+1} - y^*(\theta_k)\|_2^2 \right] \\
&\quad - \mathbb{E}\|y_k - y^*(\theta_k)\|_2^2 + \frac{\alpha_k^2 C_f^2 L_{y,2}^2}{4} + L_y^2 C_f^2 \alpha_k^2 + 2\alpha_k C_\psi^2(1 + \gamma)\epsilon_{app}. \tag{105}
\end{aligned}$$



Applying (95) to bound  $\mathbb{E} \left[ \|y_{k+1} - y^*(\theta_k)\|_2^2 \right]$ , we have

$$\begin{aligned}
& \mathbb{E}[\mathbb{V}^{k+1}] - \mathbb{E}[\mathbb{V}^k] \\
& \leq -\frac{\alpha_k}{2} \mathbb{E} \|\nabla F(\theta_k)\|^2 - \left( \frac{\alpha_k}{2} - \frac{\alpha_k}{4} - \frac{L_F \alpha_k^2}{2} \right) \mathbb{E} \|\bar{h}_f(\theta_k, y_{k+1})\|^2 + \frac{L_F C_f^2 \alpha_k^2}{2} + 2\alpha_k C_\psi^2 (1 + \gamma) \epsilon_{app} \\
& \quad + \left[ \left( 1 + \alpha_k L_{y,2}^2 + \frac{\alpha_k^2 C_f^2 L_{y,2}^2}{4} + \alpha_k C_\psi^2 (1 + \gamma) \right) (1 - 2\lambda\beta_k) - 1 \right] \mathbb{E} \|y_k - y^*(\theta_k)\|_2^2 \\
& \quad + \left( 1 + \alpha_k L_{y,2}^2 + \frac{\alpha_k^2 C_f^2 L_{y,2}^2}{4} + \alpha_k C_\psi^2 (1 + \gamma) \right) C_g^2 \beta_k^2 + \frac{\alpha_k^2 C_f^2 L_{y,2}^2}{4} + L_y^2 C_f^2 \alpha_k^2. \tag{106}
\end{aligned}$$

Similar to the steps (54)-(56), if we select

$$\alpha_k = \min \left\{ \frac{1}{2L_F}, \frac{\alpha}{\sqrt{K}} \right\}, \quad \beta_k = \frac{4L_{y,2}^2 + 8C_\psi^2 + C_f^2 L_{y,2}^2 / 2L_F}{8\lambda} \alpha_k. \tag{107}$$

which ensures that

$$\frac{\alpha_k}{4} - \frac{L_F \alpha_k^2}{2} \geq 0 \tag{108a}$$

$$\left( 1 + \alpha_k L_{y,2}^2 + \alpha_k C_\psi^2 (1 + \gamma) + \frac{\alpha_k^2 C_f^2 L_{y,2}^2}{4} \right) (1 - 2\lambda\beta_k) \leq 1 \tag{108b}$$

we can simplify (106) as

$$\begin{aligned}
\mathbb{E}[\mathbb{V}^{k+1}] - \mathbb{E}[\mathbb{V}^k] & \leq -\frac{\alpha_k}{2} \mathbb{E} \|\nabla F(\theta_k)\|^2 + \frac{L_F C_f^2 \alpha_k^2}{2} + 2\alpha_k C_\psi^2 (1 + \gamma) \epsilon_{app} + \frac{\alpha_k^2 C_f^2 L_{y,2}^2}{4} \\
& \quad + \left( 1 + \alpha_k L_{y,2}^2 + \frac{\alpha_k^2 C_f^2 L_{y,2}^2}{4} + \alpha_k C_\psi^2 (1 + \gamma) \right) C_g^2 \beta_k^2 + L_y^2 C_f^2 \alpha_k^2. \tag{109}
\end{aligned}$$

After telescoping, we have

$$\begin{aligned}
\frac{1}{K} \sum_{k=1}^K \mathbb{E} \|\nabla F(\theta_k)\|^2 & \leq \frac{2\mathbb{V}^1}{\alpha_k K} + L_F C_f^2 \alpha_k + 4C_\psi^2 (1 + \gamma) \epsilon_{app} + \frac{\alpha_k C_f^2 L_{y,2}^2}{2} + 2L_y^2 C_f^2 \alpha_k \\
& \quad + 2 \left( 1 + \alpha_k L_{y,2}^2 + \frac{\alpha_k^2 C_f^2 L_{y,2}^2}{4} + \alpha_k C_\psi^2 (1 + \gamma) \right) \frac{C_g^2 \beta_k^2}{\alpha_k} \tag{110}
\end{aligned}$$

which, together with  $\alpha_k = \mathcal{O}(1/\sqrt{K})$ ,  $\beta_k = \mathcal{O}(1/\sqrt{K})$ , completes the proof.  $\square$
